# Supplementary material for: Age-standardised incidence rate and epidemiology of colorectal cancer in Africa: a systematic review and meta-analysis
Source: PubMed Central journal article supplement — BMJ Open. 2022 Jan 17;12(1):e052376. doi: 10.1136/bmjopen-2021-052376 (PMC8765019; doi:10.1136/bmjopen-2021-052376), 2022-01-17
Supplement: bmjopen-2021-052376.draft_revisions.pdf [file bmjopen-2021-052376.draft_revisions.pdf]

# BMJ Open

BMJ Open is committed to open peer review. As part of this commitment we make the peer review history of every article we publish publicly available.

When an article is published we post the peer reviewers' comments and the authors' responses online. We also post the versions of the paper that were used during peer review. These are the versions that the peer review comments apply to.

The versions of the paper that follow are the versions that were submitted during the peer review process. They are not the versions of record or the final published versions. They should not be cited or distributed as the published version of this manuscript.

BMJ Open is an open access journal and the full, final, typeset and author-corrected version of record of the manuscript is available on our site with no access controls, subscription charges or pay-per-view fees (<http://bmjopen.bmj.com>).

If you have any questions on BMJ Open's open peer review process please email [info.bmjopen@bmj.com](mailto:info.bmjopen@bmj.com)

# BMJ Open

## Age-standardized incidence rate and epidemiology of colorectal cancer in Africa: a systematic review and meta-analysis

|                               |                                                                                                                                                                                                                                                                                                                                                                                                                                                                                                                                                                                                                                                                      |
|-------------------------------|----------------------------------------------------------------------------------------------------------------------------------------------------------------------------------------------------------------------------------------------------------------------------------------------------------------------------------------------------------------------------------------------------------------------------------------------------------------------------------------------------------------------------------------------------------------------------------------------------------------------------------------------------------------------|
| Journal:                      | <i>BMJ Open</i>                                                                                                                                                                                                                                                                                                                                                                                                                                                                                                                                                                                                                                                      |
| Manuscript ID                 | bmjopen-2021-052376                                                                                                                                                                                                                                                                                                                                                                                                                                                                                                                                                                                                                                                  |
| Article Type:                 | Original research                                                                                                                                                                                                                                                                                                                                                                                                                                                                                                                                                                                                                                                    |
| Date Submitted by the Author: | 13-Apr-2021                                                                                                                                                                                                                                                                                                                                                                                                                                                                                                                                                                                                                                                          |
| Complete List of Authors:     | Arhin, Nina; Vanderbilt University Medical Center<br>Ssentongo, Paddy; Penn State Health Milton S Hershey Medical Center, Public Health Science<br>Taylor, Morris; Penn State Health Milton S Hershey Medical Center, Public Health Science<br>Olecki, Elizabeth; Penn State Health Milton S Hershey Medical Center, Public Health Science<br>Pameijer, Colette; Penn State Health Milton S Hershey Medical Center, Public Health Science<br>Shen, Chan; Penn State Health Milton S Hershey Medical Center, Public Health Science<br>Oh, John; Penn State Health Milton S Hershey Medical Center, Trauma Surgery<br>Eng, Cathy; Vanderbilt University Medical Center |
| Keywords:                     | Epidemiology < TROPICAL MEDICINE, Public health < INFECTIOUS DISEASES, Cancer pain < ONCOLOGY                                                                                                                                                                                                                                                                                                                                                                                                                                                                                                                                                                        |
|                               |                                                                                                                                                                                                                                                                                                                                                                                                                                                                                                                                                                                                                                                                      |

SCHOLARONE™  
Manuscripts

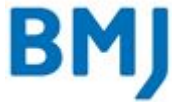

I, the Submitting Author has the right to grant and does grant on behalf of all authors of the Work (as defined in the below author licence), an exclusive licence and/or a non-exclusive licence for contributions from authors who are: i) UK Crown employees; ii) where BMJ has agreed a CC-BY licence shall apply, and/or iii) in accordance with the terms applicable for US Federal Government officers or employees acting as part of their official duties; on a worldwide, perpetual, irrevocable, royalty-free basis to BMJ Publishing Group Ltd ("BMJ") its licensees and where the relevant Journal is co-owned by BMJ to the co-owners of the Journal, to publish the Work in this journal and any other BMJ products and to exploit all rights, as set out in our [licence](#).

The Submitting Author accepts and understands that any supply made under these terms is made by BMJ to the Submitting Author unless you are acting as an employee on behalf of your employer or a postgraduate student of an affiliated institution which is paying any applicable article publishing charge ("APC") for Open Access articles. Where the Submitting Author wishes to make the Work available on an Open Access basis (and intends to pay the relevant APC), the terms of reuse of such Open Access shall be governed by a Creative Commons licence – details of these licences and which [Creative Commons](#) licence will apply to this Work are set out in our licence referred to above.

Other than as permitted in any relevant BMJ Author's Self Archiving Policies, I confirm this Work has not been accepted for publication elsewhere, is not being considered for publication elsewhere and does not duplicate material already published. I confirm all authors consent to publication of this Work and authorise the granting of this licence.

1  
2  
3 **Age-standardized incidence rate and epidemiology of colorectal cancer in Africa: a**  
4 **systematic review and meta-analysis**  
5

6  
7 Nina D. Arhin, MD<sup>1</sup>, Paddy Ssentongo, MD, MPH, PhD<sup>2,3</sup>, Morris Taylor<sup>4</sup>, Elizabeth J. Olecki,  
8 MD<sup>5</sup>, Colette Pameijer, MD, FACS<sup>5</sup>, Chan Shen, PhD<sup>4</sup>, John Oh, MD, FACS<sup>5</sup>, Cathy Eng, MD,  
9 FACP, FASCO<sup>1</sup>  
10

11  
12  
13  
14  
15 <sup>1</sup>Department of Medicine, Division of Hematology/Oncology, Vanderbilt University Medical  
16 Center, Nashville, Tennessee, United States of America  
17

18  
19 <sup>2</sup>Department of Public Health Sciences, Penn State College of Medicine and Milton S. Hershey  
20 Medical Center, Hershey, Pennsylvania, United States of America  
21

22  
23  
24 <sup>3</sup> Center for Neural Engineering, Department of Engineering, Science and Mechanics, The  
25 Pennsylvania State University, Pennsylvania, United States of America  
26

27  
28  
29 <sup>4</sup>Penn State College of Medicine, Hershey, Pennsylvania, United States of America  
30

31  
32 <sup>5</sup>Department of Surgery, Division of Trauma Surgery, Penn State College of Medicine and  
33 Milton S. Hershey Medical Center, Hershey, Pennsylvania, United States of America  
34

35 **To whom correspondence should be addressed:**

36 Paddy Ssentongo, MD, MPH, PhD  
37 500 University Drive  
38 Penn State College of Medicine  
39 Hershey PA, 17033 USA  
40 814-777-2741  
41 [pssentongo@pennstatehealth.psu.edu](mailto:pssentongo@pennstatehealth.psu.edu)  
42  
43  
44  
45  
46  
47  
48  
49  
50  
51  
52  
53  
54  
55  
56  
57  
58  
59  
60

1  
2  
3  
4  
5  
6  
7  
8  
9  
10  
11  
12  
13  
14  
15  
16  
17  
18  
19  
20  
21  
22  
23  
24  
25  
26  
27  
28  
29  
30  
31  
32  
33  
34  
35  
36  
37  
38  
39  
40  
41  
42  
43  
44  
45  
46  
47  
48  
49  
50  
51  
52  
53  
54  
55  
56  
57  
58  
59  
60

**Running head:** Colorectal cancer in Africa: a meta-analysis

**Total number of words:** 2256

**Figures:** 7

For peer review only

1  
2  
3  
4  
5  
6 **Objectives:** Colorectal cancer is the second leading cause of cancer deaths globally with low–  
7  
8 and middle–income countries (LMIC) disproportionately affected. Estimates of colorectal cancer  
9  
10 rates in LMIC are scarce. The purpose of this meta-analysis is to estimate the sex-specific  
11  
12 incidence of colorectal cancer, the trend over time and explores regional variations of cancer  
13  
14 rates on the African continent.  
15

16  
17  
18 **Design:** Systematic review and meta-analysis  
19

20  
21 **Methods:** PubMed (MEDLINE), OVID (Medline), and Scopus and Cochrane Library databases  
22  
23 were systematically searched from inception to 12/12/2020. Data for case rates and other  
24  
25 relevant clinical information, as well as population denominators, were extracted. Random effect  
26  
27 model was used to pool the estimates. Subgroup analyses were employed to explore sources of  
28  
29 heterogeneity.  
30  
31

32  
33  
34 **Outcome measures:** Overall and sex-specific annual age-standardized incidence rates of  
35  
36 colorectal cancer per 100,000 population.  
37

38  
39  
40 **Results:** The overall age-standardized incidence rates of colorectal cancer in Africa per 100,000  
41  
42 population was 5.25 (95% CI: 4.08 to 6.75). The rates were slightly higher in males (4.76) than  
43  
44 females (4.18), but not significantly different. The between-study heterogeneity of the estimates  
45  
46 was moderate ( $I^2=58\%$ ). Subgroup analysis indicated greater point estimates in North Africa  
47  
48 (8.66) than Sub-Saharan Africa (SSA) (5.91); higher estimates in Eastern (8.29) and Northern  
49  
50 (8.66) Africa compared to Western (3.55) and Southern (3.57) Africa, though not statistically  
51  
52  
53  
54  
55  
56  
57  
58  
59  
60

1  
2  
3 significant. The trend in ASIR has remained constant at nearly 5 per 100,000 population for the  
4  
5 last 6 decades.  
6  
7

8  
9 **Conclusion:** Colorectal cancer estimates in Africa are heterogeneous and could be underestimated.  
10  
11 Population-based colorectal cancer data are scarce in Africa. High-quality data collection systems  
12  
13 such as population-based cancer registries may facilitate country-specific rates and provide  
14  
15 accurate information which would be lucrative to the consideration of resources needed for  
16  
17 screening, early detection, treatment, and improving overall patient outcomes.  
18  
19

### 20 21 **Strengths and limitations of this study** 22

- 23  
24 • All United Nations regions (North Africa and sub-Saharan Africa) were represented.
- 25  
26 • UN subregions (Eastern, Western, Southern, and Northern) of Africa were represented.
- 27  
28 • Country-level data came from only 18% of the continent.
- 29  
30 • Middle Africa had no data on colorectal cancer prevalence.  
31  
32  
33  
34  
35  
36  
37  
38  
39  
40  
41  
42  
43  
44  
45  
46  
47  
48  
49  
50  
51  
52  
53  
54  
55  
56  
57  
58  
59  
60

## Introduction

Colorectal cancer (CRC) is the third most common cancer and the second leading cause of cancer deaths globally.<sup>1</sup> In 2018, there were an estimated 1.8 million new cases of colorectal cancer diagnoses and 862,000 deaths from CRC.<sup>1</sup> The majority of deaths from cancer occurred in low- and middle-income countries (LMIC), with most patients presenting with late-stage disease and commonly unable to obtain medical treatment services.

Even though the incidence of CRC has always been considered to be lower in LMIC, compared to high-income countries (HIC), the rates of colorectal cancer have been increasing in LMIC over time.<sup>2</sup> The rising incidence of cancer in LMIC has been attributed in part to the adoption of high-risk lifestyles such as smoking, excessive alcohol use, physical inactivity, as well as an aging population.<sup>3</sup>

Africa is the second largest and second most populated continent with an estimated population of 1.3 billion people in 2018, accounting for 16% of the world's human population.<sup>4</sup> Despite this vast population, CRC in Africa are not currently well characterized, in part due to deficiencies in the data on the incidence, prevalence, and mortality of all cancers in Africa. A vast majority of available data comes from existing, limited cancer registries which cover less than half of the population.<sup>5</sup> Nevertheless, based on current and available data, colorectal cancer is considered the fifth most common cancer in Africa<sup>6</sup>. The rate of CRC is estimated to be higher in Northern Africa than Sub-Saharan Africa (SSA) due to the absence of screening systems and population-based cancer registries in SSA.<sup>5 6</sup>

This systematic review and meta-analysis aims to comprehensively characterize and estimate the incidence of CRC based on available data. These estimates will raise awareness regarding the



1  
2  
3 current incidence of colorectal cancer in Africa and will guide future public health allocation of  
4 resources to prevent, control and treat colorectal cancer.  
5  
6  
7  
8  
9

## 10 11 **METHODS**

### 12 13 **Search Strategy and Selection Criteria**

14  
15 This study adheres to the reporting guidance provided in the Preferred Reporting Items for  
16 Systematic Reviews and Meta-Analyses (PRISMA).<sup>7 8</sup> We searched PubMed (MEDLINE),  
17 OVID (Medline), Scopus and Cochrane Library databases from inception to 12/12/2020. We  
18 searched the grey or difficult to locate literature, including Google Scholar and preprint servers.  
19 We performed hand-searching of the reference lists of included studies, relevant reviews, or  
20 other relevant documents. No limitations were identified relating to study design, language, or  
21 date of publication. The search terms of interest were identified by using Medical Search  
22 Headings (MeSH). They included “colorectal cancer” OR “colon cancer” OR “rectal cancer”  
23 OR “colorectal carcinoma” AND “epidemiology” OR “incidence” OR “prevalence” AND “  
24 Africa”. Duplicate studies were initially extracted via Endnote software. Three reviewers (NA,  
25 MT, and PS) independently screened titles and abstracts of the studies for inclusion eligibility.  
26 The comprehensive list of studies found from the initial search was transferred into Endnote,  
27 which further removed duplicate studies. The inclusion criteria for this meta-analysis and  
28 systematic review were defined as studies that 1) reported the incidence or prevalence estimates  
29 of colorectal cancer in Africa 2) conducted in human subjects 3) population-based (all cases in a  
30 defined geographical area, or hospital or community-based surveillance). Excluded studies were  
31 not conducted in humans or did not directly report the rates of colorectal cancer, meta-analyses,  
32 literature reviews, or commentaries.  
33  
34  
35  
36  
37  
38  
39  
40  
41  
42  
43  
44  
45  
46  
47  
48  
49  
50  
51  
52  
53  
54  
55  
56  
57  
58  
59  
60

## Patient and public involvement

This meta-analysis is based on study-level data and no individual-level data were involved in the study or in defining the research question.

## Data Extraction and Quality Assessment

After the reviewers initially screened titles and abstracts of potential articles, full-text articles were independently screened by three reviewers (NA, MT, and PS) for eligibility. In the event of a discrepancy regarding an article's inclusion, a consensus was reached by discussion. Articles that met inclusion criteria had appropriate data extracted using a standard data collection form. We extracted the following information: the year of publication, country, region, cohort and cohort year, study design, sample size, gender percent, sample size of patients with CRC. If duplicate articles identified, we included only mutually exclusive data.

## Assessment of Methodological Quality of the Papers

The methodological quality of studies was conducted using the Newcastle-Ottawa Quality Assessment Scale, a validated tool for assessing quantitative cross-sectional, case-control and cohort studies.<sup>9</sup> Scores of 8 to the maximum score of 9 was defined as high quality, scores of 5 to 7 as intermediate quality, and scores of 1 to 4 as low quality.

## Standardization

Age standardization of incidence rates was carried out by the direct method, using age specific rates for 5-year age groups and the world standard population and were reported by each paper.<sup>10</sup>

## Statistical Analysis

The primary outcome of interest was the overall and sex-specific annual age-standardized incidence rate of colorectal cancer. The `metaprop` function from the R package *meta* was used to calculate the pooled effect estimates using random-effects models.<sup>11</sup> We applied the DerSimonian and Laird (DL) random-effects method to estimate the pooled between-study variance (heterogeneity).<sup>12</sup> Individual and pooled estimates were graphically displayed using forest plots. A random-effects model assumes the observed estimates of colorectal cancer can vary across studies because of real differences in the effect in each study as well as sampling variability (chance). Between-study heterogeneity was assessed using  $I^2$  statistics, expressed as % (low (25%), moderate (50%), and high (75%)) and Cochrane's  $Q$  statistic (significance level  $< 0.05$ ).<sup>13</sup> To investigate the sources of heterogeneity, we conducted subgroup analyses using year of study (Before and after the year 2000), United Nations regions (Sub-Saharan African vs. North Africa), United Nations subregions (Western, Eastern, Southern, Northern, and Eastern Africa). Results were reported as the annual age-standardized incidence rate per 100,000 person-time. Potential ascertainment bias (as might be caused by publication bias) was assessed with funnel plots by plotting the study effect size against standard errors of the effect size and Egger/Begg test.<sup>14</sup> All statistical analyses were performed with R software, version 4.0.3 (R Core Team, Vienna, Austria).

## Results

### Study Selection

Our initial searches yielded 1203 studies, of which 53 underwent full-text screening (Figure 1). Of these, 22 were Conference proceedings, 15 came from overlapping populations and 2 were systematic reviews. A total of 14 studies matched all the eligibility criteria. Of the included studies, 2 were from South Africa,<sup>15 16</sup> 2 from Zimbabwe,<sup>17 18</sup> and 1 from Ghana<sup>19</sup>, Eritrea,<sup>20</sup> The Gambia,<sup>21</sup> Guinea,<sup>22</sup> Ivory Coast,<sup>23</sup> Mali<sup>24</sup>, Malawi<sup>25</sup> and Tunisia,<sup>26</sup> Uganda,<sup>27</sup> and Sudan<sup>28</sup> each. The paper by Wabinga and colleagues (2000) from Uganda described cancer incidence at 4-time points, 1960-1966; 1967-1971; 1991-1994 and 1995-1997.<sup>27</sup> These time points were analyzed independently to allow for trend analysis. Subjects were 53% male, and the mean age was 58 years. The percentage of colon and rectal cancer were 65% and 35%, respectively. The percentage with locally advanced and metastatic disease (stage III and IV) was 57.9%. Adenocarcinoma represented the majority of diagnosed colorectal cancers with a small proportion representing squamous cell carcinoma. Grade 1, 2, and 3 were 32.4, 60.7, and 8.36%, respectively.

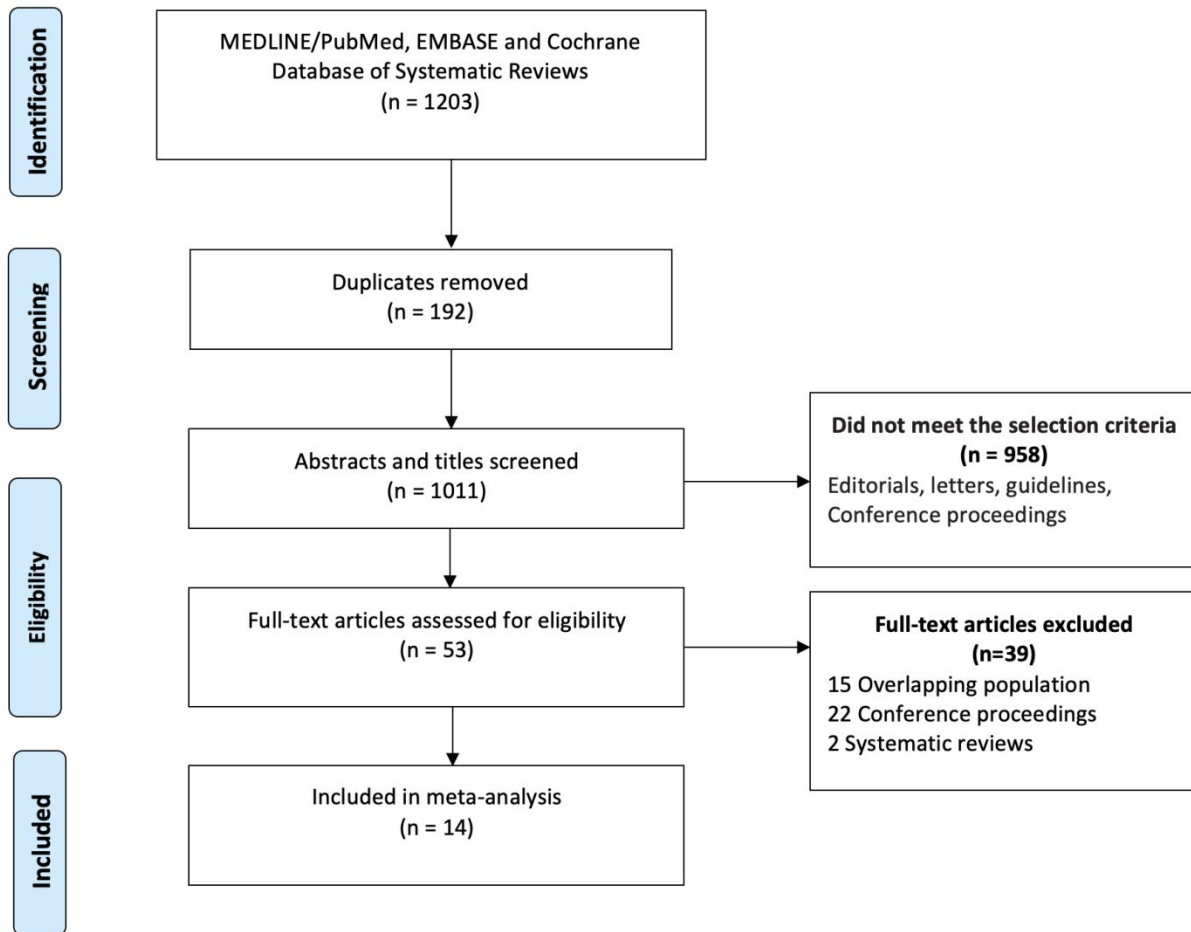

35  
36  
37  
38  
39

**Figure 1: Figure 1:** PRISMA flowchart of a systematic review of colorectal cancer incidence in Africa

40  
41

### Annual age-standardized incidence rate of colorectal cancer per 100,000 person-year

42  
43  
44  
45  
46  
47  
48  
49  
50  
51  
52  
53  
54  
55  
56  
57  
58  
59  
60

As displayed in **Figure 2**, the overall annual age-standardized incidence rate of colorectal cancer per 100,000 person-year was 6.30 (95% CI: 4.59 to 8.65). The rates were slightly higher in males than the female population but not significantly different (4.76 versus 4.18). The heterogeneity was moderate ( $I^2=58\%$ ).

1  
2  
3  
4  
5  
6  
7  
8  
9  
10  
11  
12  
13  
14  
15  
16  
17  
18  
19  
20  
21  
22  
23  
24  
25  
26  
27  
28  
29  
30  
31  
32  
33  
34  
35  
36  
37  
38  
39  
40  
41  
42  
43  
44  
45  
46  
47  
48  
49  
50  
51  
52  
53  
54  
55  
56  
57  
58  
59  
60

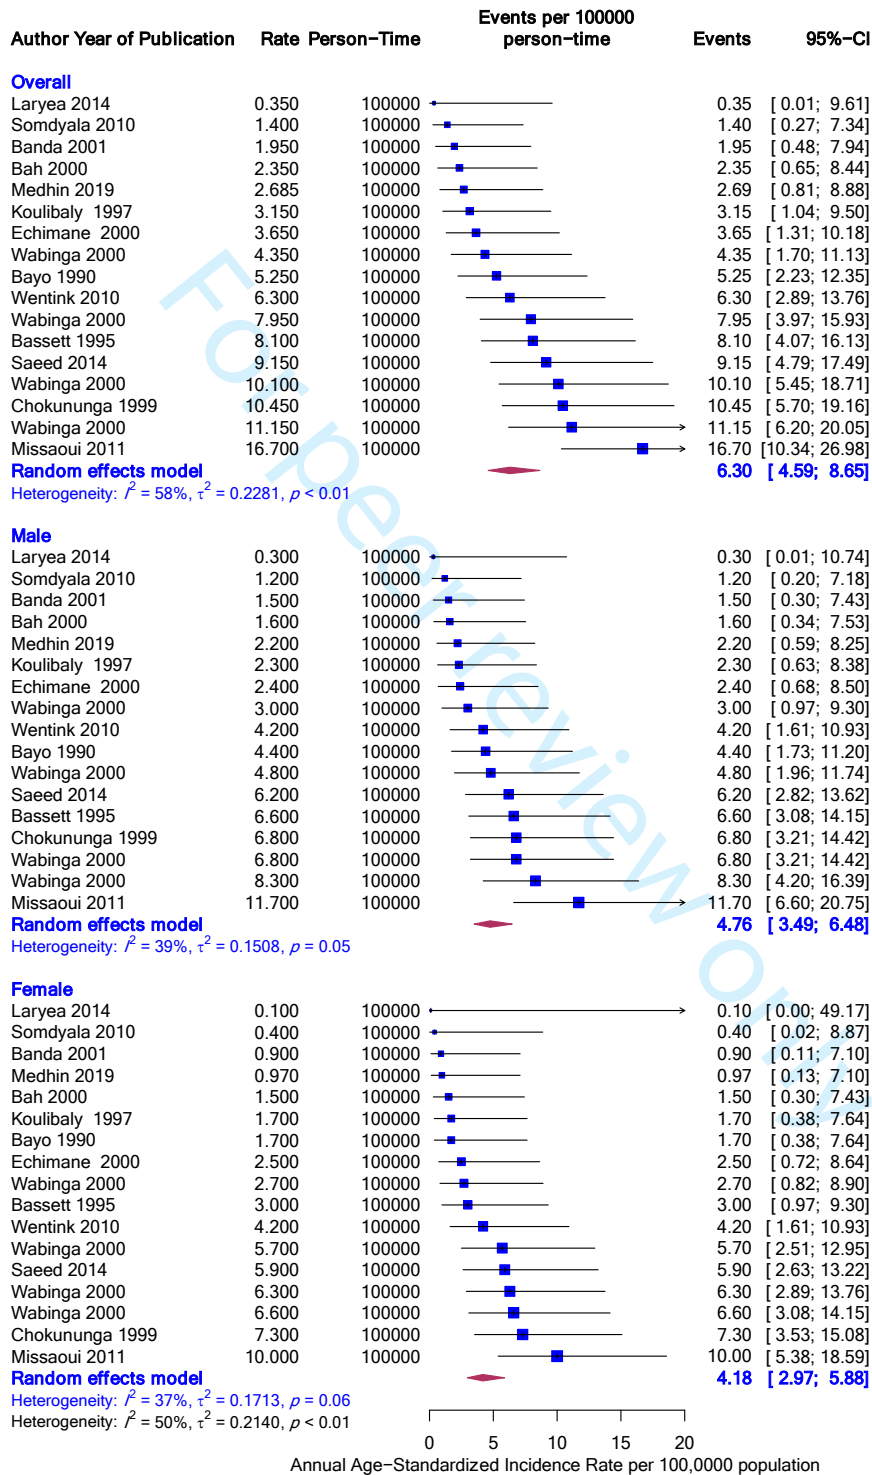

1  
2  
3  
4  
5  
6 **Figure 2: Overall and sex-specific annualized ASIR of colorectal cancer in Africa.**  
7

8 Event values represent the age-standardized incidence rates of colorectal cancer per 100,000  
9 population. Blue squares and their corresponding lines are the point estimates and 95% confidence  
10 intervals (95% CI). Maroon diamonds represent the pooled estimate of the ASIR, overall and by  
11 sex (width denotes 95% CI). Although not statistically significant, the pooled ASIR of colorectal  
12 cancer in Africa was higher in males ( $I^2=39$ ) than the female population ( $I^2=37$ ). P for interaction  
13 comparing the different subgroups =0.37.  
14  
15

16  
17  
18 Subgroup analysis was performed by the United Nations regions (North Africa vs. Sub-Saharan  
19 Africa) and by United Nations subregions. Although the point estimate was higher in North Africa  
20 (8.66) compared to SSA (5.91), the difference was not significant (**Figure 3**).  
21  
22  
23  
24  
25  
26  
27  
28  
29  
30  
31  
32  
33  
34  
35  
36  
37  
38  
39  
40  
41  
42  
43  
44  
45  
46  
47  
48  
49  
50  
51  
52  
53  
54  
55  
56  
57  
58  
59  
60

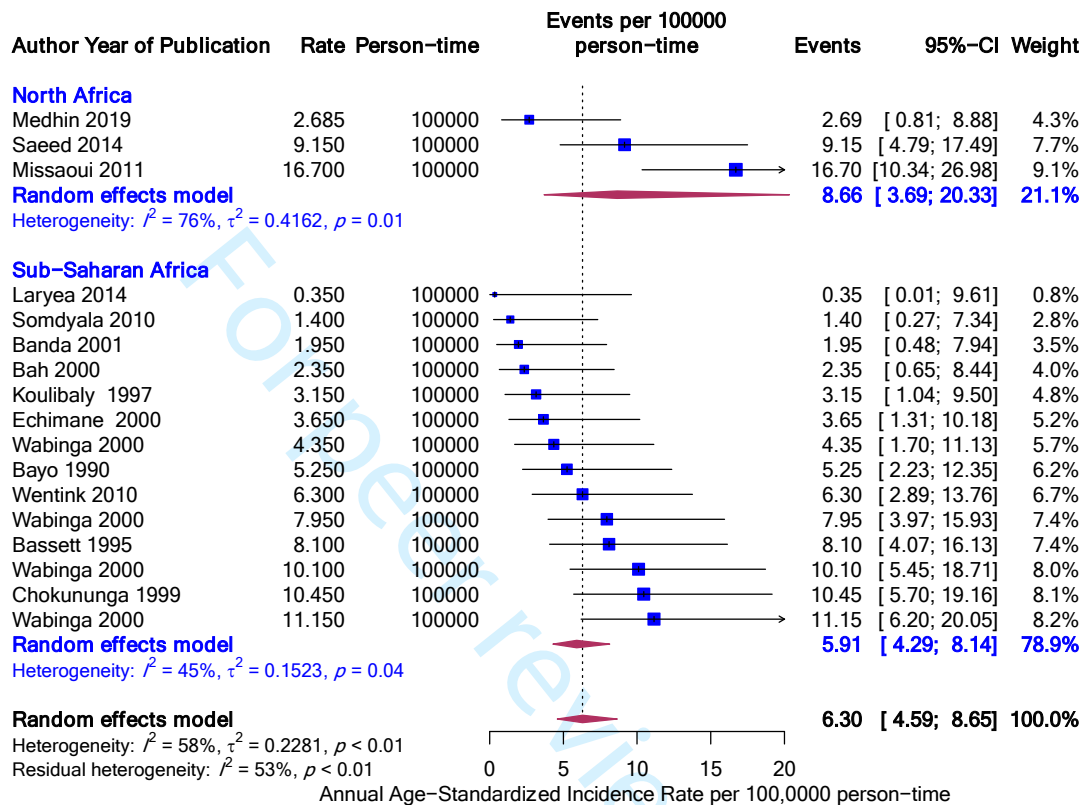

**Figure 3: Overall ASIR (per 100,000 population) of colorectal cancer in Africa stratified by United Nations region (North Africa and sub-Saharan Africa).**

Event values represent the age-standardized incidence rates of colorectal cancer per 100,000 population. Blue squares and their corresponding lines are the point estimates and 95% confidence intervals (95% CI). Maroon diamonds represent the pooled estimate of the ASIR, overall and by **United Nations regions** (width denotes 95% CI). Although not statistically significant, the pooled ASIR of colorectal cancer in Africa was higher in North Africa ( $I^2=76$ ) than SSA ( $I^2=45$ ). P for interaction comparing the different subgroups =0.21.



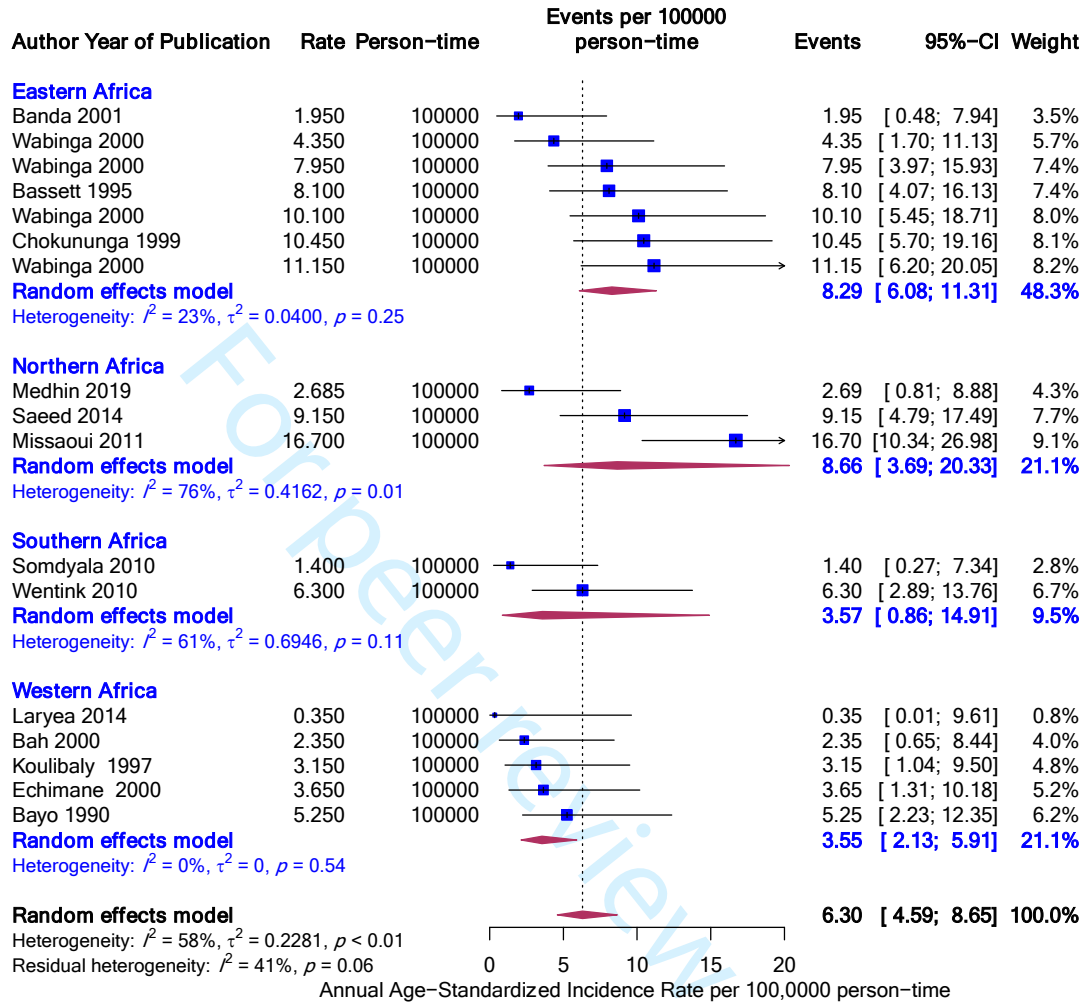

**Figure 4: ASIR (per 100,000 population) of colorectal cancer in Africa stratified by United Nations subregions (Northern, Western, Eastern, and Southern Africa).**

Event values represent the age-standardized incidence rates of colorectal cancer per 100,000 population. Blue squares and their corresponding lines are the point estimates and 95% confidence intervals (95% CI). Maroon diamonds represent the pooled estimate of the ASIR, overall and by United Nations subregion (width denotes 95% CI).

Furthermore, the rates were greater in Eastern (8.29) and Northern (8.66) Africa compared to Western (3.55) and Southern (3.57) Africa, but not significantly different (**Figure 4**). To assess if the rates from recent studies (2000 and later) are higher than older studies (Before 2000), we carried out a stratified analysis. There was no difference in the rates of CRC 5.55 (95% CI: 2.57 to 11.96) and 6.50 (95% CI: 4.72 to 8.94), respectively (**Figure 5**). The trend in ASIR has remained nearly constant at 4.5 per 100,000 population for the last 6 decades (**Figure 6**)

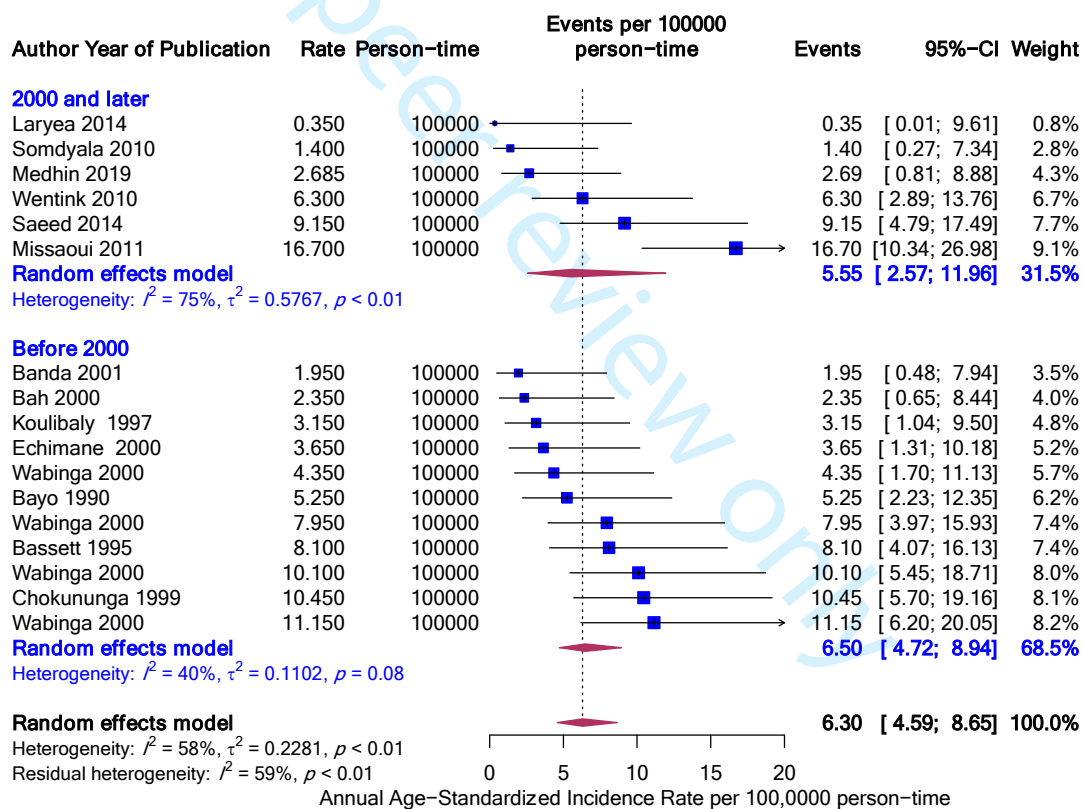

**Figure 5:** ASIR (per 100,000 population) of colorectal cancer in Africa stratified by year of study (Before 2000 and 2000 and after).

Event values represent the age-standardized incidence rates of colorectal cancer per 100,000 population. Blue squares and their corresponding lines are the point estimates and 95% confidence intervals (95% CI). Maroon diamonds represent the pooled estimate of the ASIR, overall and by year categorized as before and after 2000 (width denotes 95% CI). No difference in the rates between the year categories.

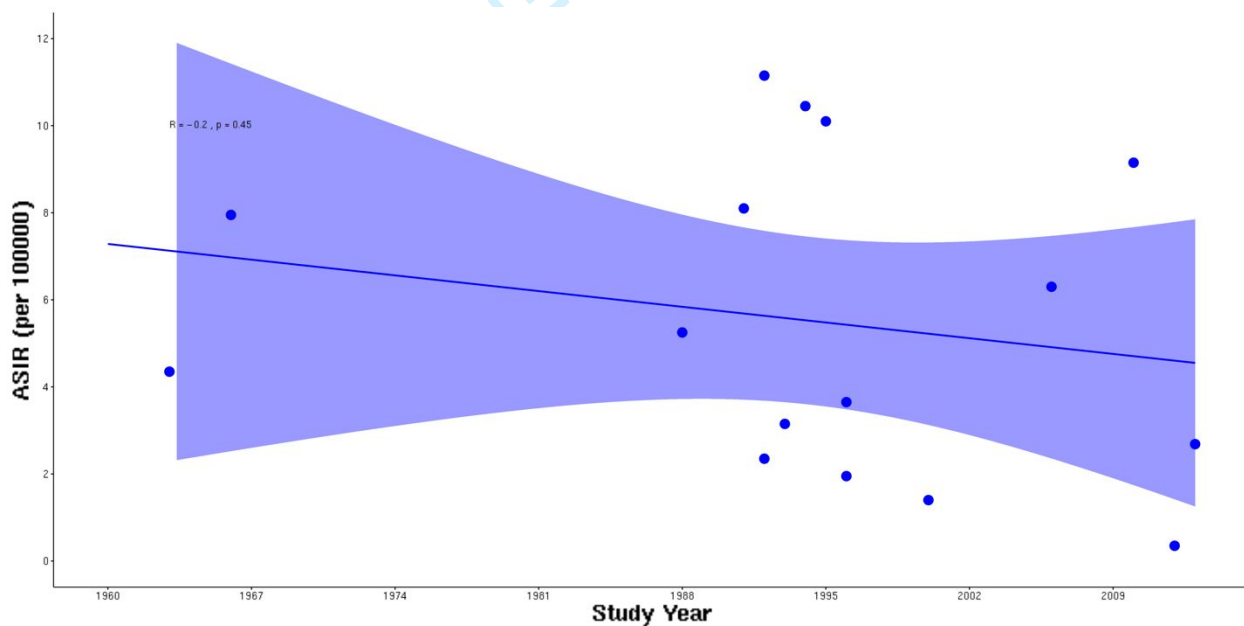

**Figure 6:** Temporal trends in the incidence rates (per 100,000 population) of colorectal cancer in Africa. Rates are constant over time.

## Study Quality, Publication Bias, and Sensitivity Analyses

The median study quality score for studies reporting on the incidence was 5 out of 8 (range=4–9). The funnel plot (**Figure 7A**) the value of the Egger test ( $p<0.0001$ ) and Begg test ( $p<0.0001$ ) indicated the presence of publication bias. We used the trim and fill method to adjust for the publication bias. If the asymmetry is due to publication bias, the adjusted estimates fall in the range of 5.76 to 12.22. Finally, Influence sensitivity analyses were by excluding and replaced one study at a time (leave-one-out method) from the meta-analysis and calculate the pooled ASIR for the remaining studies. No significant change from any of the pooled estimates observed when other studies were removed in turn. The pooled ASIR ranged from 5.93 to 6.67 (**Figure 7B**)

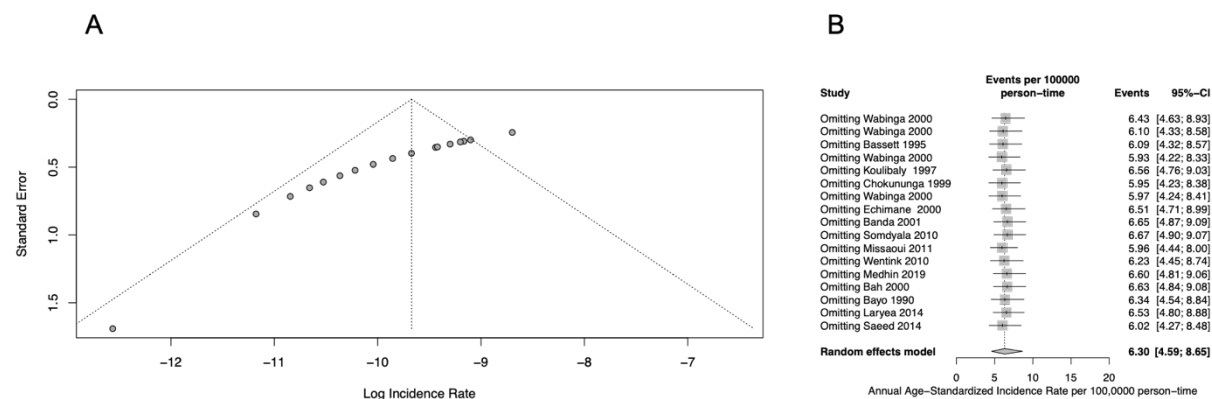

**Figure 7: Publication bias and sensitivity analyses.** Funnel plot were not interpretable (**Figure 7A**). Influence analysis shows no significant change from any of the pooled estimates observed when other studies were removed in turn. The pooled ASIR ranged from 5.93 to 6.67 (**Figure 7B**)

1  
2  
3  
4  
5  
6  
7  
8  
9  
10  
11  
12  
13  
14  
15  
16  
17  
18  
19  
20  
21  
22  
23  
24  
25  
26  
27  
28  
29  
30  
31  
32  
33  
34  
35  
36  
37  
38  
39  
40  
41  
42  
43  
44  
45  
46  
47  
48  
49  
50  
51  
52  
53  
54  
55  
56  
57  
58  
59  
60

For peer review only

## Discussion

This paper provides a comprehensive meta-analysis of the patterns and trends in the CRC incidence in Africa. The estimated annual age-standardized incidence rate (ASIR) of colorectal cancer per 100,000 persons was 6.30. This rate is higher than that reported in 2012 in a systematic review of only sub-Saharan Africa (SSA) countries by Graham et al. which reported a crude incidence rate of 4.04 per 100,000.<sup>5</sup> When compared to SSA, North Africa had the highest ASIR of 8.66, while SSA had an ASIR of 5.91. Rapid westernization of Northern Africa, including diet and lifestyle changes and readily available cancer registries compared to SSA, could explain these potential differences in colorectal cancer rates<sup>8</sup>. Middle Africa was not represented in this meta-analysis.

CRC is known to be the most common malignancy of the GI tract<sup>29</sup>, and while previously thought to be a rare malignancy in Africa, recent data is proving otherwise.<sup>30 31</sup> CRC has been shown to be on the rise in many individual countries in Africa and now represents nearly half of all malignant tumors in some countries. In addition to being more common than previously recognized, CRC in Africa tends to present more commonly in young adults<sup>31</sup>. This trend in young adults is similar to current trends in the United States, Asia and Europe, where patients usually present with advanced stage, left-sided tumors, and poor histology.<sup>32</sup>

In the United States, colorectal cancer is the third most common cancer in both men and women but the 2<sup>nd</sup> leading cause of cancer death.<sup>33</sup> Rates of colorectal cancer in the United States have been declining since the mid-1980s in patients older than 50 years old, mainly due to increased cancer screening and changes in lifestyle<sup>15</sup>. This is in sharp contrast to young adults < 50 years old

1  
2  
3 where there is an expected exponential increase over the next decade.<sup>34</sup> According to a study by  
4 Siegel et al. (2020), the ASIR of colorectal cancer in the United States from 2012-2016 was 38.7  
5 per 100,000 persons<sup>21</sup>. Furthermore, in the United States, the ASIR in Blacks from 2012-2016 was  
6 45.7 compared to 38.6 in Non-Hispanic Whites. In the United Kingdom, the ASIR for 2017 was  
7 68.0 per 100,000 persons<sup>22</sup>. The incidence of colorectal cancer in people of African descent in the  
8 United States is 20% higher compared to Caucasians<sup>23</sup>. Furthermore, in the United States, people  
9 of African descent present at a younger age and with more advanced disease at diagnosis and have  
10 the highest mortality rate among different ethnic groups<sup>24</sup>. Factors responsible for these  
11 differences are multifactorial, including known health disparities, socioeconomic status, genetic  
12 factors, and dietary influences<sup>25</sup>.  
13  
14  
15  
16  
17  
18  
19  
20  
21  
22  
23  
24  
25  
26  
27  
28  
29  
30

31 Even though our study provides much lower age-standardized incidence rates, it is assumed that  
32 these do not accurately reflect the actual incidence of colorectal cancer in Africa. We suspect this  
33 number to be much higher. According to the study by Laiyemo et al. (2016), there is no population-  
34 based colorectal cancer screening or guidelines in any African country to date.<sup>35 36</sup>  
35  
36  
37  
38  
39  
40  
41  
42  
43  
44  
45  
46  
47  
48  
49  
50  
51  
52  
53  
54  
55  
56  
57  
58  
59  
60

1  
2  
3 To better understand the true incidence rates of colorectal cancer in Africa, standardized  
4 screening guidelines must be established. Given the lack of screening, patients commonly  
5 present with advanced disease. More countries are implementing and establishing population  
6 based cancer registries (PBCR)<sup>36</sup> described in this study by Omonisi and his colleagues. These  
7 registries should inform us of more specific country incidence rates and allow for further  
8 population-based studies that could unravel the mysteries behind the increased risk of colorectal  
9 cancer in people of African descent.  
10  
11  
12  
13  
14  
15  
16  
17  
18  
19  
20

21 The present analysis has major strengths. First, all United Nations regions (North Africa, SSA)  
22 and subregions (Eastern, Western, Southern, and Northern Africa ) of Africa were represented  
23 (except Middle Africa). Thus, our findings can be generalizable at the regional level of Africa.  
24 Secondly, we included recent estimates of colorectal cancer in Africa. The present estimates are  
25 the most updated figures if the rates of colorecta cancer in Africa and thus can be used to inform  
26 the prevention and control strategies. Nevertheless, the present study has some limitations. First,  
27 country-level data came from only 18% of the continent, meaning most countries were not  
28 represented due to the lack of published literature on CRC incidence in these countries. Therefore,  
29 the estimates may not be generalizable at the country-level. To mitigate this limitation, we  
30 conducted subgroup analysis by African regions (North Africa, SSA) and subregions (Eastern,  
31 Western, Southern, and Northern Africa) to explore possible regional and subregional specific  
32 rates. Second, the estimates could suffer from potential selection bias due to a lack of random  
33 population-based studies such as those conducted by the demographic and health surveys program  
34 and country-based cancer registries. Nevertheless, the present systematic review and meta-analysis  
35  
36  
37  
38  
39  
40  
41  
42  
43  
44  
45  
46  
47  
48  
49  
50  
51  
52  
53  
54  
55  
56  
57  
58  
59  
60



1  
2  
3 provides the updated estimates of colorectal cancer in Africa using the best available information,  
4  
5 and we have applied rigorous sensitivity analysis to minimize bias.  
6  
7  
8  
9

## 10 **Conclusion**

11  
12  
13 Colorectal cancer estimates in Africa are heterogeneous and could be underestimated.  
14  
15 Population-based colorectal cancer data are scarce in Africa. High-quality data collection  
16  
17 systems such as population-based cancer registries may facilitate country-specific rates and  
18  
19 provide accurate information which would be lucrative to the consideration of resources needed  
20  
21 for screening, early detection, treatment and improving overall patient outcomes.  
22  
23  
24  
25  
26  
27  
28  
29  
30  
31  
32  
33  
34  
35  
36  
37  
38  
39  
40  
41  
42  
43  
44  
45  
46  
47  
48  
49  
50  
51  
52  
53  
54  
55  
56  
57  
58  
59  
60

1  
2  
3 **Contributorship** NDA, CE, CS and PS envisioned the study. NDA, MT and PS extracted data.  
4 PS: carried out the statistical analysis and created figures. NDA and PS drafted the manuscript  
5 and made subsequent revisions. CE, JO, CS and supervised the study. All authors read and revised  
6 the manuscript and All authors read and approved the final version of this manuscript.  
7  
8  
9

10 **Funding** Support was provided by NIH Director's Pioneer Award 1DP1HD086071 (PS).  
11

12 **Competing interests** None declared.  
13

14 **Patient consent for publication** Not required.  
15

16 **Ethics approval** Not applicable  
17

18 **Ethical considerations**  
19

20 This is a systematic review using publicly available data. Therefore, no IRB was required.  
21  
22

23 **Provenance and peer review** Not commissioned, externally peer reviewed.  
24  
25

26 **Data availability statement** All data needed to reproduce the results are included in the  
27 manuscript.  
28

29 **ORCID iD:** Paddy Ssentongo <http://orcid.org/0000-0003-1565-5731>  
30  
31  
32  
33  
34  
35  
36  
37  
38  
39  
40  
41  
42  
43  
44  
45  
46  
47  
48  
49  
50  
51  
52  
53  
54  
55  
56  
57  
58  
59  
60

## REFERENCES

1. Bray F, Ferlay J, Soerjomataram I, et al. Global cancer statistics 2018: GLOBOCAN estimates of incidence and mortality worldwide for 36 cancers in 185 countries. *CA: a cancer journal for clinicians* 2018;68(6):394-424.
2. Arnold M, Sierra MS, Laversanne M, et al. Global patterns and trends in colorectal cancer incidence and mortality. *Gut* 2017;66(4):683-91.
3. Negin J, Cumming R, de Ramirez SS, et al. Risk factors for non-communicable diseases among older adults in rural Africa. *Tropical Medicine & International Health* 2011;16(5):640-46.
4. Anoba IB. How a population of 4.2 billion could impact Africa by 2100: the possible economic. *The SAIS Review of International Affairs* 2019
5. Graham A, Davies Adeloye LG, Theodoratou E, et al. Estimating the incidence of colorectal cancer in Sub-Saharan Africa: A systematic analysis. *Journal of global health* 2012;2(2)
6. Parkin DM, Bray F, Ferlay J, et al. Cancer in africa 2012. *Cancer Epidemiology and Prevention Biomarkers* 2014;23(6):953-66.
7. Stroup DF, Berlin JA, Morton SC, et al. Meta-analysis of observational studies in epidemiology: a proposal for reporting. *Jama* 2000;283(15):2008-12.
8. Moher D, Liberati A, Tetzlaff J, et al. Preferred reporting items for systematic reviews and meta-analyses: the PRISMA statement. *PLoS med* 2009;6(7):e1000097.
9. Peterson J, Welch V, Losos M, et al. The Newcastle-Ottawa scale (NOS) for assessing the quality of nonrandomised studies in meta-analyses. *Ottawa: Ottawa Hospital Research Institute* 2011
10. Parkin D. Comparability and quality control in cancer registration. *IARC Technical Report* 1994;19:18-19.
11. Schwarzer G, Carpenter JR, Rücker G. Meta-analysis with R: Springer 2015.
12. DerSimonian R, Kacker R. Random-effects model for meta-analysis of clinical trials: an update. *Contemporary clinical trials* 2007;28(2):105-14.
13. Higgins JP, Thompson SG, Deeks JJ, et al. Measuring inconsistency in meta-analyses. *Bmj* 2003;327(7414):557-60.
14. Egger M, Smith GD, Schneider M, et al. Bias in meta-analysis detected by a simple, graphical test. *Bmj* 1997;315(7109):629-34.
15. Wentink M, Räckers M, Stupart D, et al. Incidence and histological features of colorectal cancer in the Northern Cape Province, South Africa. *South African Journal of Surgery* 2010;48(4):109-13.
16. Somdya NI, Bradshaw D, Gelderblom WC, et al. Cancer incidence in a rural population of South Africa, 1998–2002. *International Journal of Cancer* 2010;127(10):2420-29.
17. Chokunonga E, Levy L, Bassett M, et al. Cancer incidence in the African population of Harare, Zimbabwe: second results from the cancer registry 1993–1995. *International journal of cancer* 2000;85(1):54-59.
18. Bassett M, Chokunonga E, Mauchaza B, et al. Cancer in the African population of Harare, Zimbabwe, 1990–1992. *International journal of cancer* 1995;63(1):29-36.
19. Laryea DO, Awuah B, Amoako YA, et al. Cancer incidence in Ghana, 2012: evidence from a population-based cancer registry. *BMC cancer* 2014;14(1):1-8.

- 1
  - 2
  - 3
  - 4
  - 5
  - 6
  - 7
  - 8
  - 9
  - 10
  - 11
  - 12
  - 13
  - 14
  - 15
  - 16
  - 17
  - 18
  - 19
  - 20
  - 21
  - 22
  - 23
  - 24
  - 25
  - 26
  - 27
  - 28
  - 29
  - 30
  - 31
  - 32
  - 33
  - 34
  - 35
  - 36
  - 37
  - 38
  - 39
  - 40
  - 41
  - 42
  - 43
  - 44
  - 45
  - 46
  - 47
  - 48
  - 49
  - 50
  - 51
  - 52
  - 53
  - 54
  - 55
  - 56
  - 57
  - 58
  - 59
  - 60
20. Medhin LB, Achila OO, Abrham AT, et al. Incidence of colorectal cancer in Eritrea: Data from the National Health Laboratory, 2011-2017. *PloS one* 2019;14(11):e0224045.
21. Bah E, Parkin D, Hall A, et al. Cancer in the Gambia: 1988–97. *British journal of cancer* 2001;84(9):1207-14.
22. Koulibaly M, Kabba IS, Cissé A, et al. Cancer incidence in Conakry, Guinea: first results from the Cancer Registry 1992–1995. *International Journal of Cancer* 1997;70(1):39-45.
23. Echimane AK, Ahnoux AA, Adoubi I, et al. Cancer incidence in Abidjan, Ivory Coast: first results from the cancer registry, 1995–1997. *Cancer* 2000;89(3):653-63.
24. Bayo S, Parkin DM, Koumare A, et al. Cancer in Mali, 1987–1988. *International Journal of Cancer* 1990;45(4):679-84.
25. Banda L, Parkin D, Dzamalala C, et al. Cancer incidence in Blantyre, Malawi 1994–1998. *Tropical Medicine & International Health* 2001;6(4):296-304.
26. Missaoui N, Jaidaine L, Abdelkader AB, et al. Colorectal cancer in central Tunisia: increasing incidence trends over a 15-year period. *Asian Pac J Cancer Prev* 2011;12(4):1073-76.
27. Wabinga H, Parkin D, Wabwire-Mangen F, et al. Trends in cancer incidence in Kyadondo County, Uganda, 1960–1997. *British journal of cancer* 2000;82(9):1585-92.
28. Saeed IE, Weng HY, Mohamed KH, et al. Cancer incidence in Khartoum, Sudan: first results from the Cancer Registry, 2009–2010. *Cancer medicine* 2014;3(4):1075-84.
29. Siegel RL, Miller KD, Jemal A. Cancer statistics, 2015. *CA: a cancer journal for clinicians* 2015;65(1):5-29.
30. Agyemang-Yeboah F, Yorke J, Obirikorang C, et al. Patterns and presentations of colorectal cancer at Komfo-Anokye teaching hospital Kumasi, Ghana. *Pan African Medical Journal* 2017;28(1):142.
31. Irabor D, Adedeji O. Colorectal cancer in Nigeria: 40 years on. A review. *European journal of cancer care* 2009;18(2):110-15.
32. Mauri G, Sartore-Bianchi A, Russo AG, et al. Early-onset colorectal cancer in young individuals. *Molecular oncology* 2019;13(2):109-31.
33. Gu M, Thapa S. Colorectal cancer in the United States and a review of its heterogeneity among Asian American subgroups. *Asia-Pacific Journal of Clinical Oncology* 2020;16(4):193-200.
34. Bailey CE, Hu C-Y, You YN, et al. Increasing disparities in the age-related incidences of colon and rectal cancers in the United States, 1975-2010. *JAMA surgery* 2015;150(1):17-22.
35. Laiyemo AO, Brawley O, Irabor D, et al. Towards colorectal cancer control in Africa. *International journal of cancer Journal international du cancer* 2016;138(4):1033.
36. Omonisi AE, Liu B, Parkin DM. Population-Based Cancer Registration in Sub-Saharan Africa: Its Role in Research and Cancer Control. *JCO Global Oncology* 2020;6

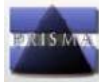

## PRISMA 2020 Checklist

| Section and Topic             | Item # | Checklist item                                                                                                                                                                                                                                                                                       | Location where item is reported |
|-------------------------------|--------|------------------------------------------------------------------------------------------------------------------------------------------------------------------------------------------------------------------------------------------------------------------------------------------------------|---------------------------------|
| <b>TITLE</b>                  |        |                                                                                                                                                                                                                                                                                                      |                                 |
| Title                         | 1      | Identify the report as a systematic review.                                                                                                                                                                                                                                                          | 1                               |
| <b>ABSTRACT</b>               |        |                                                                                                                                                                                                                                                                                                      |                                 |
| Abstract                      | 2      | See the PRISMA 2020 for Abstracts checklist.                                                                                                                                                                                                                                                         | 2                               |
| <b>INTRODUCTION</b>           |        |                                                                                                                                                                                                                                                                                                      |                                 |
| Rationale                     | 3      | Describe the rationale for the review in the context of existing knowledge.                                                                                                                                                                                                                          | 4                               |
| Objectives                    | 4      | Provide an explicit statement of the objective(s) or question(s) the review addresses.                                                                                                                                                                                                               | 4                               |
| <b>METHODS</b>                |        |                                                                                                                                                                                                                                                                                                      |                                 |
| Eligibility criteria          | 5      | Specify the inclusion and exclusion criteria for the review and how studies were grouped for the syntheses.                                                                                                                                                                                          | 5                               |
| Information sources           | 6      | Specify all databases, registers, websites, organisations, reference lists and other sources searched or consulted to identify studies. Specify the date when each source was last searched or consulted.                                                                                            | 5                               |
| Search strategy               | 7      | Present the full search strategies for all databases, registers and websites, including any filters and limits used.                                                                                                                                                                                 | 5                               |
| Selection process             | 8      | Specify the methods used to decide whether a study met the inclusion criteria of the review, including how many reviewers screened each record and each report retrieved, whether they worked independently, and if applicable, details of automation tools used in the process.                     | 6                               |
| Data collection process       | 9      | Specify the methods used to collect data from reports, including how many reviewers collected data from each report, whether they worked independently, any processes for obtaining or confirming data from study investigators, and if applicable, details of automation tools used in the process. | 6                               |
| Data items                    | 10a    | List and define all outcomes for which data were sought. Specify whether all results that were compatible with each outcome domain in each study were sought (e.g. for all measures, time points, analyses), and if not, the methods used to decide which results to collect.                        | 6                               |
|                               | 10b    | List and define all other variables for which data were sought (e.g. participant and intervention characteristics, funding sources). Describe any assumptions made about any missing or unclear information.                                                                                         | 6                               |
| Study risk of bias assessment | 11     | Specify the methods used to assess risk of bias in the included studies, including details of the tool(s) used, how many reviewers assessed each study and whether they worked independently, and if applicable, details of automation tools used in the process.                                    | 6                               |
| Effect measures               | 12     | Specify for each outcome the effect measure(s) (e.g. risk ratio, mean difference) used in the synthesis or presentation of results.                                                                                                                                                                  | 7                               |
| Synthesis methods             | 13a    | Describe the processes used to decide which studies were eligible for each synthesis (e.g. tabulating the study intervention characteristics and comparing against the planned groups for each synthesis (item #5)).                                                                                 | 7                               |
|                               | 13b    | Describe any methods required to prepare the data for presentation or synthesis, such as handling of missing summary statistics, or data conversions.                                                                                                                                                | 7                               |
|                               | 13c    | Describe any methods used to tabulate or visually display results of individual studies and syntheses.                                                                                                                                                                                               | 7                               |
|                               | 13d    | Describe any methods used to synthesize results and provide a rationale for the choice(s). If meta-analysis was performed, describe the model(s), method(s) to identify the presence and extent of statistical heterogeneity, and software package(s) used.                                          |                                 |
|                               | 13e    | Describe any methods used to explore possible causes of heterogeneity among study results (e.g. subgroup analysis, meta-regression).                                                                                                                                                                 | 7                               |
|                               | 13f    | Describe any sensitivity analyses conducted to assess robustness of the synthesized results.                                                                                                                                                                                                         | 7                               |
| Reporting bias assessment     | 14     | Describe any methods used to assess risk of bias due to missing results in a synthesis (arising from reporting biases).                                                                                                                                                                              | 7                               |
| Certainty                     | 15     | Describe any methods used to assess certainty (or confidence) in the body of evidence for an outcome.                                                                                                                                                                                                | 7                               |

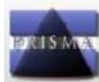

## PRISMA 2020 Checklist

| Section and Topic                              | Item # | Checklist item                                                                                                                                                                                                                                                                       | Location where item is reported |
|------------------------------------------------|--------|--------------------------------------------------------------------------------------------------------------------------------------------------------------------------------------------------------------------------------------------------------------------------------------|---------------------------------|
| assessment                                     |        |                                                                                                                                                                                                                                                                                      |                                 |
| <b>RESULTS</b>                                 |        |                                                                                                                                                                                                                                                                                      |                                 |
| Study selection                                | 16a    | Describe the results of the search and selection process, from the number of records identified in the search to the number of studies included in the review, ideally using a flow diagram.                                                                                         | 8-16                            |
|                                                | 16b    | Cite studies that might appear to meet the inclusion criteria, but which were excluded, and explain why they were excluded.                                                                                                                                                          | 8                               |
| Study characteristics                          | 17     | Cite each included study and present its characteristics.                                                                                                                                                                                                                            | 8                               |
| Risk of bias in studies                        | 18     | Present assessments of risk of bias for each included study.                                                                                                                                                                                                                         | 8-16                            |
| Results of individual studies                  | 19     | For all outcomes, present, for each study: (a) summary statistics for each group (where appropriate) and (b) an effect estimate and its precision (e.g. confidence/credible interval), ideally using structured tables or plots.                                                     | 8-16                            |
| Results of syntheses                           | 20a    | For each synthesis, briefly summarise the characteristics and risk of bias among contributing studies.                                                                                                                                                                               | 8-16                            |
|                                                | 20b    | Present results of all statistical syntheses conducted. If meta-analysis was done, present for each the summary estimate and its precision (e.g. confidence/credible interval) and measures of statistical heterogeneity. If comparing groups, describe the direction of the effect. | 8-16                            |
|                                                | 20c    | Present results of all investigations of possible causes of heterogeneity among study results.                                                                                                                                                                                       | 8-16                            |
|                                                | 20d    | Present results of all sensitivity analyses conducted to assess the robustness of the synthesized results.                                                                                                                                                                           | 8-16                            |
| Reporting biases                               | 21     | Present assessments of risk of bias due to missing results (arising from reporting biases) for each synthesis assessed.                                                                                                                                                              | 8-16                            |
| Certainty of evidence                          | 22     | Present assessments of certainty (or confidence) in the body of evidence for each outcome assessed.                                                                                                                                                                                  | 8-16                            |
| <b>DISCUSSION</b>                              |        |                                                                                                                                                                                                                                                                                      |                                 |
| Discussion                                     | 23a    | Provide a general interpretation of the results in the context of other evidence.                                                                                                                                                                                                    | 18-21                           |
|                                                | 23b    | Discuss any limitations of the evidence included in the review.                                                                                                                                                                                                                      | 18-21                           |
|                                                | 23c    | Discuss any limitations of the review processes used.                                                                                                                                                                                                                                | 18-21                           |
|                                                | 23d    | Discuss implications of the results for practice, policy, and future research.                                                                                                                                                                                                       | 20                              |
| <b>OTHER INFORMATION</b>                       |        |                                                                                                                                                                                                                                                                                      |                                 |
| Registration and protocol                      | 24a    | Provide registration information for the review, including register name and registration number, or state that the review was not registered.                                                                                                                                       | 5                               |
|                                                | 24b    | Indicate where the review protocol can be accessed, or state that a protocol was not prepared.                                                                                                                                                                                       | 5                               |
|                                                | 24c    | Describe and explain any amendments to information provided at registration or in the protocol.                                                                                                                                                                                      | NA                              |
| Support                                        | 25     | Describe sources of financial or non-financial support for the review, and the role of the funders or sponsors in the review.                                                                                                                                                        | 22                              |
| Competing interests                            | 26     | Declare any competing interests of review authors.                                                                                                                                                                                                                                   | 22                              |
| Availability of data, code and other materials | 27     | Report which of the following are publicly available and where they can be found: template data collection forms; data extracted from included studies; data used for all analyses; analytic code; any other materials used in the review.                                           | 22                              |

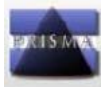

## PRISMA 2020 Checklist

For more information, visit: <http://www.prisma-statement.org/>

For peer review only

- 1
- 2
- 3
- 4
- 5
- 6
- 7
- 8
- 9
- 10
- 11
- 12
- 13
- 14
- 15
- 16
- 17
- 18
- 19
- 20
- 21
- 22
- 23
- 24
- 25
- 26
- 27
- 28
- 29
- 30
- 31
- 32
- 33
- 34
- 35
- 36
- 37
- 38
- 39
- 40
- 41
- 42
- 43
- 44
- 45
- 46
- 47

# BMJ Open

## Age-standardized incidence rate and epidemiology of colorectal cancer in Africa: a systematic review and meta-analysis

|                                 |                                                                                                                                                                                                                                                                                                                                                                                                                                                                                                                                                                                                                                                                      |
|---------------------------------|----------------------------------------------------------------------------------------------------------------------------------------------------------------------------------------------------------------------------------------------------------------------------------------------------------------------------------------------------------------------------------------------------------------------------------------------------------------------------------------------------------------------------------------------------------------------------------------------------------------------------------------------------------------------|
| Journal:                        | <i>BMJ Open</i>                                                                                                                                                                                                                                                                                                                                                                                                                                                                                                                                                                                                                                                      |
| Manuscript ID                   | bmjopen-2021-052376.R1                                                                                                                                                                                                                                                                                                                                                                                                                                                                                                                                                                                                                                               |
| Article Type:                   | Original research                                                                                                                                                                                                                                                                                                                                                                                                                                                                                                                                                                                                                                                    |
| Date Submitted by the Author:   | 06-Nov-2021                                                                                                                                                                                                                                                                                                                                                                                                                                                                                                                                                                                                                                                          |
| Complete List of Authors:       | Arhin, Nina; Vanderbilt University Medical Center<br>Ssentongo, Paddy; Penn State Health Milton S Hershey Medical Center, Public Health Science<br>Taylor, Morris; Penn State Health Milton S Hershey Medical Center, Public Health Science<br>Olecki, Elizabeth; Penn State Health Milton S Hershey Medical Center, Public Health Science<br>Pameijer, Colette; Penn State Health Milton S Hershey Medical Center, Public Health Science<br>Shen, Chan; Penn State Health Milton S Hershey Medical Center, Public Health Science<br>Oh, John; Penn State Health Milton S Hershey Medical Center, Trauma Surgery<br>Eng, Cathy; Vanderbilt University Medical Center |
| <b>Primary Subject Heading</b>: | Epidemiology                                                                                                                                                                                                                                                                                                                                                                                                                                                                                                                                                                                                                                                         |
| Secondary Subject Heading:      | Global health, Oncology                                                                                                                                                                                                                                                                                                                                                                                                                                                                                                                                                                                                                                              |
| Keywords:                       | Epidemiology < TROPICAL MEDICINE, Public health < INFECTIOUS DISEASES, Cancer pain < ONCOLOGY                                                                                                                                                                                                                                                                                                                                                                                                                                                                                                                                                                        |
|                                 |                                                                                                                                                                                                                                                                                                                                                                                                                                                                                                                                                                                                                                                                      |

SCHOLARONE™  
Manuscripts





I, the Submitting Author has the right to grant and does grant on behalf of all authors of the Work (as defined in the below author licence), an exclusive licence and/or a non-exclusive licence for contributions from authors who are: i) UK Crown employees; ii) where BMJ has agreed a CC-BY licence shall apply, and/or iii) in accordance with the terms applicable for US Federal Government officers or employees acting as part of their official duties; on a worldwide, perpetual, irrevocable, royalty-free basis to BMJ Publishing Group Ltd ("BMJ") its licensees and where the relevant Journal is co-owned by BMJ to the co-owners of the Journal, to publish the Work in this journal and any other BMJ products and to exploit all rights, as set out in our [licence](#).

The Submitting Author accepts and understands that any supply made under these terms is made by BMJ to the Submitting Author unless you are acting as an employee on behalf of your employer or a postgraduate student of an affiliated institution which is paying any applicable article publishing charge ("APC") for Open Access articles. Where the Submitting Author wishes to make the Work available on an Open Access basis (and intends to pay the relevant APC), the terms of reuse of such Open Access shall be governed by a Creative Commons licence – details of these licences and which [Creative Commons](#) licence will apply to this Work are set out in our licence referred to above.

Other than as permitted in any relevant BMJ Author's Self Archiving Policies, I confirm this Work has not been accepted for publication elsewhere, is not being considered for publication elsewhere and does not duplicate material already published. I confirm all authors consent to publication of this Work and authorise the granting of this licence.

1  
2  
3 **Age-standardized incidence rate and epidemiology of colorectal cancer in Africa: a**  
4 **systematic review and meta-analysis**  
5

6 Nina D. Arhin, MD<sup>1\*</sup>, Paddy Ssentongo, MD, MPH, PhD<sup>2,3\*</sup>, Morris Taylor<sup>4</sup>, Elizabeth J. Olecki,  
7 MD<sup>5</sup>, Colette Pameijer, MD, FACS<sup>5</sup>, Chan Shen, PhD<sup>5</sup>, John Oh, MD, FACS<sup>5</sup>, Cathy Eng, MD,  
8 FACP, FASCO<sup>1</sup>  
9

10  
11  
12 <sup>1</sup>Department of Medicine, Division of Hematology/Oncology, Vanderbilt University Medical  
13 Center, Nashville, Tennessee, United States of America  
14

15  
16  
17 <sup>2</sup>Department of Public Health Sciences, Penn State College of Medicine and Milton S. Hershey  
18 Medical Center, Hershey, Pennsylvania, United States of America  
19

20  
21  
22 <sup>3</sup> Center for Neural Engineering, Department of Engineering, Science and Mechanics, The  
23 Pennsylvania State University, Pennsylvania, United States of America  
24

25  
26 <sup>4</sup>Penn State College of Medicine, Hershey, Pennsylvania, United States of America  
27

28  
29 <sup>5</sup>Department of Surgery, Division of Trauma Surgery, Penn State College of Medicine and  
30 Milton S. Hershey Medical Center, Hershey, Pennsylvania, United States of America  
31

32 \*Contributed equally as co-first authors  
33

34 **To whom correspondence should be addressed:**

35 Paddy Ssentongo, MD, MPH, PhD  
36 500 University Drive  
37 Penn State College of Medicine  
38 Hershey PA, 17033 USA  
39 814-777-2741  
40 [pssentongo@pennstatehealth.psu.edu](mailto:pssentongo@pennstatehealth.psu.edu)  
41  
42

43 **Running head:** Colorectal cancer in Africa: a meta-analysis  
44

45 **Total number of words:** 2256

46 **Figures:** 7  
47  
48  
49  
50  
51  
52  
53  
54  
55  
56  
57  
58  
59  
60

1  
2  
3  
4  
5  
6 **Objectives:** Colorectal cancer is the second leading cause of cancer deaths globally, with low–  
7  
8 and middle–income countries (LMIC) disproportionately affected. Estimates of colorectal cancer  
9  
10 rates in LMIC are scarce. The objective of this meta-analysis is to estimate (1) sex-specific  
11  
12 incidence of colorectal cancer, (2) temporal trend and (3) determine regional variations of cancer  
13  
14 rates on the African continent.  
15

16  
17  
18 **Design:** Systematic review and meta-analysis  
19

20  
21 **Methods:** PubMed (MEDLINE), OVID (MEDLINE), Scopus and Cochrane Library databases  
22  
23 were systematically searched from inception to 12/12/2020 for articles reporting the incidence  
24  
25 rates of colorectal cancers in Africa. Random effects model was used to pool the estimates.  
26  
27 Subgroup analyses were employed to explore sources of heterogeneity. The methodological  
28  
29 quality of studies was conducted using the Newcastle-Ottawa Scale.  
30  
31

32  
33  
34 **Outcome measures:** Overall and sex-specific annual age-standardized incidence rates of  
35  
36 colorectal cancer per 100,000 population.  
37  
38

39  
40 **Results:** The overall age-standardized incidence rates of colorectal cancer in Africa per 100,000  
41  
42 population was 5.25 (95% CI: 4.08 to 6.75). The rates were slightly higher in males (4.76) than  
43  
44 in females (4.18), but not significantly different. The between-study heterogeneity of the  
45  
46 estimates was moderate ( $I^2=58\%$ ). Subgroup analysis indicated greater point estimates in North  
47  
48 Africa (8.66) compared to Sub-Saharan Africa (SSA) (5.91); and higher estimates in Eastern  
49  
50 Africa (8.66) compared to Western (3.55) and Southern (3.57) Africa, but  
51  
52 (8.29) and Northern (8.66) Africa compared to Western (3.55) and Southern (3.57) Africa, but  
53  
54  
55  
56  
57  
58  
59

1  
2  
3 not statistically significant. The overall trend in ASIR has remained constant at nearly 5 per  
4  
5 100,000 population for the last 6 decades.  
6  
7

8  
9 **Conclusion:** Colorectal cancer estimates in Africa are heterogeneous and could be underestimated.  
10  
11 Population-based colorectal cancer data are scarce in Africa. High-quality data collection systems  
12  
13 such as population-based cancer registries may facilitate accurate estimation of country-specific  
14  
15 rates and provide critical information which would be lucrative to the consideration of resources  
16  
17 needed for screening, early detection, treatment, and improving overall patient outcomes.  
18  
19

20 **Funding:** None.  
21  
22

### 23 **Strengths and limitations of this study**

24  
25  
26

- 27 • All United Nations (UN) regions (North Africa and sub-Saharan Africa) were  
28 represented.  
29
- 30 • UN subregions (Eastern, Western, Southern, and Northern) of Africa were represented.  
31
- 32 • Country-level data came from only 18% of the continent.  
33
- 34 • Middle Africa had no data on colorectal cancer prevalence.  
35  
36  
37  
38  
39  
40  
41  
42  
43  
44  
45  
46  
47  
48  
49  
50  
51  
52  
53  
54  
55  
56  
57  
58  
59  
60

## Introduction

Colorectal cancer (CRC) is the third most common cancer and the second leading cause of cancer deaths globally.<sup>1</sup> In 2018, there were an estimated 1.8 million new cases of colorectal cancer diagnoses and 862,000 deaths from CRC.<sup>1</sup> The majority of deaths from cancer occurred in low- and middle-income countries (LMIC), with most patients presenting with late-stage disease and commonly unable to obtain medical treatment services.

Even though the incidence of CRC has always been considered to be lower in LMIC, compared to high-income countries (HIC), the rates of colorectal cancer have been increasing in LMIC over time.<sup>2</sup> The rising incidence of cancer in LMIC has been attributed in part to the adoption of high-risk lifestyles such as smoking, excessive alcohol use, physical inactivity, as well as an aging population.<sup>3</sup>

Africa is the second largest and second most populated continent with an estimated population of 1.3 billion people in 2018, accounting for 16% of the world's human population.<sup>4</sup> Despite this vast population, CRC in Africa is not currently well characterized, in part due to deficiencies in the data on the incidence, prevalence, and mortality of all cancers in Africa. A vast majority of available data come from existing, limited cancer registries which cover less than half of the population.<sup>5</sup> Nevertheless, based on current and available data, colorectal cancer is considered the fifth most common cancer in Africa<sup>6</sup>. The rate of CRC is estimated to be higher in Northern Africa than Sub-Saharan Africa (SSA) due to the absence of screening systems and population-based cancer registries in SSA.<sup>5 6</sup>

This systematic review and meta-analysis aims to comprehensively characterize and estimate the incidence of CRC based on available data. These estimates will raise awareness regarding the

1  
2  
3 current incidence of CRC in Africa and will guide future public health allocation of resources to  
4 prevent, control and treat CRC.  
5  
6  
7  
8  
9

## 10 11 **METHODS**

### 12 13 **Search Strategy and Selection Criteria**

14  
15 This study adheres to the reporting guidance provided in the Preferred Reporting Items for  
16 Systematic Reviews and Meta-Analyses (PRISMA) in Supplementary Table 1.<sup>7,8</sup> We searched  
17 PubMed (MEDLINE), OVID (MEDLINE), Scopus and Cochrane Library databases from  
18 inception to 12/12/2020 for articles reporting the incidence rates of colorectal cancers in Africa.  
19  
20 We searched the grey or difficult to locate literature, including Google Scholar and preprint  
21 servers. We performed hand-searching of the reference lists of included studies, relevant  
22 reviews, or other relevant documents. The search terms of interest were identified by using  
23 Medical Search Headings (MeSH). They included “colorectal cancer” OR “colon cancer” OR  
24 “rectal cancer” OR “colorectal carcinoma” AND “epidemiology” OR “incidence” OR  
25 “prevalence” AND “Africa”. Duplicate studies were initially extracted via Endnote software.  
26  
27 Three reviewers (NA, MT, and PS) independently screened titles and abstracts of the studies for  
28 inclusion eligibility. The comprehensive list of studies found from the initial search was  
29 transferred into Endnote, which further removed duplicate studies. The inclusion criteria for this  
30 meta-analysis and systematic review were defined as studies that 1) reported the incidence or  
31 prevalence estimates of colorectal cancer in Africa 2) were conducted in human subjects 3) were  
32 population-based (all cases in a defined geographical area, or hospital or community-based  
33 surveillance). Excluded studies were not conducted in humans or did not directly report the rates  
34 of colorectal cancer, meta-analyses, literature reviews, or commentaries.  
35  
36  
37  
38  
39  
40  
41  
42  
43  
44  
45  
46  
47  
48  
49  
50  
51  
52  
53  
54  
55  
56  
57  
58  
59  
60

### **Patient and public involvement**

No patient and public involvement in this systematic review and meta-analysis.

### **Data Extraction and Quality Assessment**

After the reviewers initially screened titles and abstracts of potential articles, full-text articles were independently screened by three reviewers (NA, MT, and PS) for eligibility. In the event of a discrepancy regarding an article's inclusion, a consensus was reached by discussion. Articles that met inclusion criteria had appropriate data extracted using a standard data collection form. We extracted the following information: the year of publication, country, region, cohort and cohort year, study design, sample size, gender percent, sample size of patients with CRC. If duplicate articles identified, we included only mutually exclusive data.

### **Assessment of Methodological Quality of the Papers**

The methodological quality of studies was conducted using the Newcastle-Ottawa Scale, a validated tool for assessing quantitative cross-sectional, case-control and cohort studies.<sup>9</sup> Scores of 8 to the maximum score of 9 were defined as high quality, scores of 5 to 7 as intermediate quality, and scores of 1 to 4 as low quality.

### **Standardization**

Age standardization of incidence rates was carried out by the direct method, using age specific rates for 5-year age groups and the world standard population and was reported by each paper.<sup>10</sup>

## Statistical Analysis

The primary outcome of interest was the overall and sex-specific annual age-standardized incidence rate of colorectal cancer. The *metaprop* function from the R package *meta* was used to calculate the pooled effect estimates using random-effects models.<sup>11</sup> We applied the DerSimonian and Laird (DL) random-effects method to estimate the pooled between-study variance (heterogeneity).<sup>12</sup> Individual and pooled estimates were graphically displayed using forest plots. A random-effects model assumes the observed estimates of colorectal cancer can vary across studies because of real differences in the effect in each study as well as sampling variability (chance). Between-study heterogeneity was assessed using  $I^2$  statistics, expressed as % (low (25%), moderate (50%), and high (75%)) and Cochrane's  $Q$  statistic (significance level < 0.05).<sup>13</sup> To investigate the sources of heterogeneity, we conducted subgroup analyses using year of study (Before and after the year 2000), United nations regions (Sub-Saharan African vs. North Africa) and United Nations subregions (Western, Eastern, Southern, Northern, and Eastern Africa). Results were reported as the annual age-standardized incidence rate per 100,000 person-time. Potential ascertainment bias (as might be caused by publication bias) was assessed with funnel plots by plotting the study effect size against standard errors of the effect size and Egger/Begg test.<sup>14</sup> All statistical analyses were performed with R software, version 4.0.3 (R Core Team, Vienna, Austria).



## Results

### Study Selection

Our initial searches yielded 1203 studies, of which 53 underwent full-text screening (**Figure 1**). Of these, 22 were Conference proceedings, 15 came from overlapping populations and 2 were systematic reviews. A total of 14 studies matched all the eligibility criteria. Of the included studies, 2 were from South Africa,<sup>15 16</sup> 2 from Zimbabwe,<sup>17 18</sup> and 1 from Ghana<sup>19</sup>, Eritrea,<sup>20</sup> The Gambia,<sup>21</sup> Guinea,<sup>22</sup> Ivory Coast,<sup>23</sup> Mali<sup>24</sup>, Malawi<sup>25</sup> and Tunisia,<sup>26</sup> Uganda,<sup>27</sup> and Sudan<sup>28</sup> each. The paper by Wabinga and colleagues (2000) from Uganda described cancer incidence at 4-time points, 1960-1966; 1967-1971; 1991-1994 and 1995-1997.<sup>27</sup> These time points were analyzed independently to allow for trend analysis. Subjects were 53% male, and the mean age was 58 years. The percentages of colon and rectal cancer were 65% and 35%, respectively. The percentage with locally advanced and metastatic disease (stage III and IV) was 57.9%. Adenocarcinoma represented the majority of diagnosed colorectal cancers with a small proportion representing squamous cell carcinoma. Grades 1, 2, and 3 were 32.4, 60.7, and 8.36%, respectively.

### Annual age-standardized incidence rate of colorectal cancer per 100,000 person-year

As displayed in **Figure 2**, the overall annual age-standardized incidence rate of colorectal cancer per 100,000 person-year was 6.30 (95% CI: 4.59 to 8.65). The rates were slightly higher in males

1  
2  
3 than in females but not significantly different (4.76 versus 4.18). The heterogeneity was moderate  
4  
5 ( $I^2=58%$  ).  
6

7  
8 Subgroup analysis was performed by the United Nations regions (North Africa vs. Sub-Saharan  
9  
10 Africa) and by United Nations subregions. Although the point estimate was higher in North Africa  
11  
12 (8.66) compared to SSA (5.91), the difference was not significant (**Figure 3**).  
13  
14

15  
16  
17 Furthermore, the rates were greater in Eastern (8.29) and Northern (8.66) Africa compared to  
18  
19 Western (3.55) and Southern (3.57) Africa, but not significantly different (**Figure 4**). To assess if  
20  
21 the rates from recent studies (2000 and later) are higher than older studies (Before 2000), we  
22  
23 carried out a stratified analysis. There was no difference in the rates of CRC 5.55 (95% CI: 2.57  
24  
25 to 11.96) and 6.50 (95% CI: 4.72 to 8.94), respectively (**Figure 5**). The trend in ASIR has remained  
26  
27 nearly constant at 4.5 per 100,000 population for the last 6 decades (**Figure 6**)  
28  
29  
30

### 31 32 33 **Study Quality, Publication Bias, and Sensitivity Analyses**

34  
35

36  
37 The median study quality score for studies reporting on the incidence was 5 out of 8 (range=4–9).  
38  
39 The funnel plot (Supplemental **Figure 1A**) the value of the Egger test ( $p<0.0001$ ) and Begg test (  
40  
41  $p<0.0001$ ) indicated the presence of publication bias. We used the trim and fill method to adjust  
42  
43 for the publication bias. If the asymmetry is due to publication bias, the adjusted estimates fall in  
44  
45 the range of 5.76 to 12.22. Finally, Influence sensitivity analyses were by excluding and replacing  
46  
47 one study at a time (leave-one-out method) from the meta-analysis and calculating the pooled  
48  
49 ASIR for the remaining studies. No significant change from any of the pooled estimates was  
50  
51 observed when other studies were removed in turn. The pooled ASIR ranged from 5.93 to 6.67  
52  
53  
54  
55 (Supplemental **Figure 1B**)  
56  
57  
58  
59  
60

## Discussion

This paper provides a comprehensive meta-analysis of the patterns and trends in the CRC incidence in Africa. The estimated annual age-standardized incidence rate (ASIR) of colorectal cancer per 100,000 persons was 6.30. This rate is higher than reported in a 2012 systematic review of only sub-Saharan Africa (SSA) countries by Graham et al. which reported a crude incidence rate of 4.04 per 100,000.<sup>5</sup> When compared to SSA, North Africa had the highest ASIR of 8.66, while SSA had an ASIR of 5.91. Middle Africa was not represented in this meta-analysis.

CRC is known to be the most common malignancy of the GI tract<sup>29</sup>, and while previously thought to be a rare malignancy in Africa, recent data is proving otherwise.<sup>30 31</sup> In addition to being more common than previously recognized, CRC in Africa tends to present more commonly in young adults<sup>31</sup>. This trend in young adults is similar to current trends in the United States, Asia and Europe, where patients usually present with advanced stage, left-sided tumors, and poor histology.<sup>32</sup>

In the United States, colorectal cancer is the third most common cancer in both men and women but the 2<sup>nd</sup> leading cause of cancer death.<sup>33</sup> Rates of colorectal cancer in the United States have been declining since the mid-1980s in patients older than 50 years old, mainly due to increased cancer screening and changes in lifestyle<sup>15</sup>. This is in sharp contrast to young adults < 50 years old where there is an expected exponential increase between 2020 through 2030.<sup>34</sup> According to a study by Siegel et al. (2020), the ASIR of colorectal cancer in the United States from 2012-2016

1  
2  
3 was 38.7 per 100,000 persons<sup>21</sup>. Furthermore, in the United States, the ASIR in Blacks from 2012-  
4  
5 2016 was 45.7 compared to 38.6 in Non-Hispanic Whites. In the United Kingdom, the ASIR for  
6  
7 2017 was 68.0 per 100,000 persons<sup>22</sup>. The incidence of colorectal cancer in people of African  
8  
9 descent in the United States is 20% higher than the incidence in Caucasians<sup>23</sup>. In the United  
10  
11 States, people of African descent present at a younger age and with more advanced disease at  
12  
13 diagnosis and have the highest mortality rate among different ethnic groups<sup>35</sup>. Factors responsible  
14  
15 for these differences are multifactorial, including known health disparities, socioeconomic status,  
16  
17 genetic factors, and dietary influences<sup>36 37</sup>.  
18  
19  
20  
21  
22  
23

24 Even though our study provides much lower age-standardized incidence rates, it is assumed that  
25  
26 these do not accurately reflect the actual incidence of colorectal cancer in Africa. We suspect this  
27  
28 number to be much higher. According to the study by Laiyemo et al. (2016), there is no population-  
29  
30 based colorectal cancer screening or guidelines in any African country to date.<sup>38 39</sup> To better  
31  
32 understand the true incidence rates of colorectal cancer in Africa, standardized screening  
33  
34 guidelines must be established. Given the lack of screening, patients commonly present with  
35  
36 advanced disease. More countries are implementing and establishing population based cancer  
37  
38 registries (PBCR)<sup>39</sup> described in this study by Omonisi and his colleagues. These registries should  
39  
40 inform us of more specific country incidence rates and allow for further population-based studies  
41  
42 that could unravel the mysteries behind the increased risk of colorectal cancer in people of African  
43  
44 descent.  
45  
46  
47  
48  
49  
50

51 The present analysis has major strengths. First, all United Nations regions (North Africa, SSA)  
52  
53 and subregions (Eastern, Western, Southern, and Northern Africa ) of Africa were represented  
54  
55  
56  
57  
58  
59  
60

1  
2  
3 (except Middle Africa). Thus, our findings can be generalizable at the regional level of Africa.  
4  
5 Secondly, we included recent estimates of colorectal cancer in Africa. The present estimates are  
6  
7 the most updated figures of the rates of colorectal cancer in Africa and thus can be used to inform  
8  
9 the prevention and control strategies. Nevertheless, the present study has some limitations. First,  
10  
11 country-level data came from only 18% of the continent, meaning most countries were not  
12  
13 represented due to the lack of published literature on CRC incidence in these countries. Therefore,  
14  
15 the estimates may not be generalizable at the country-level. To mitigate this limitation, we  
16  
17 conducted subgroup analysis by African regions (North Africa, SSA) and subregions (Eastern,  
18  
19 Western, Southern, and Northern Africa) to explore possible regional and subregional specific  
20  
21 rates. Second, the estimates could suffer from potential selection bias due to a lack of random  
22  
23 population-based studies such as those conducted by the demographic and health surveys program  
24  
25 and country-based cancer registries. However, the present systematic review and meta-analysis  
26  
27 provides the updated estimates of colorectal cancer in Africa using the best available information,  
28  
29 and we have applied rigorous sensitivity analysis to minimize bias.  
30  
31  
32  
33  
34  
35  
36  
37

## 38 **Conclusion**

39  
40  
41 Colorectal cancer estimates in Africa are heterogeneous and could be underestimated.  
42  
43 Population-based colorectal cancer data are scarce in Africa. High-quality data collection  
44  
45 systems such as population-based cancer registries may facilitate country-specific rates and  
46  
47 provide accurate information which would be lucrative to the consideration of resources needed  
48  
49 for screening, early detection, treatment and improving overall patient outcomes.  
50  
51  
52  
53  
54  
55  
56  
57  
58  
59  
60

1  
2  
3 **Contributorship** NDA, CE and PS conceived and designed the study. NDA, MT and PS  
4 extracted data. PS performed statistical analysis and created figures. NDA and PS drafted the  
5 manuscript and made subsequent revisions. CE and JO supervised the study. EJO, CP and CS  
6 critically revised the manuscript for intellectual content. All authors read and approved the final  
7 version of this manuscript.  
8  
9

10  
11 **Funding** None  
12

13 **Competing interests** None declared.  
14

15 **Patient consent for publication** Not required.  
16

17 **Ethics approval** Not applicable  
18

19 **Ethical considerations**  
20

21  
22 This is a systematic review using publicly available data. We analyzed aggregated data and no  
23 personal identification information was accessed or reported. Therefore, no IRB was required.  
24  
25

26 **Provenance and peer review** Not commissioned, externally peer reviewed.  
27

28 **Data availability statement** All data needed to reproduce the results are included in the  
29 manuscript.  
30

31 **ORCID iD:** Paddy Ssentongo <http://orcid.org/0000-0003-1565-5731>  
32  
33  
34  
35  
36  
37  
38  
39  
40  
41  
42  
43  
44  
45  
46  
47  
48  
49  
50  
51  
52  
53  
54  
55  
56  
57  
58  
59  
60

## Figure legend

**Figure 1:** PRISMA flowchart of a systematic review of colorectal cancer incidence in Africa

**Figure 2: Overall and sex-specific annualized ASIR of colorectal cancer in Africa.** Event values represent the age-standardized incidence rates of colorectal cancer per 100,000 population. Blue squares and their corresponding lines are the point estimates and 95% confidence intervals (95% CI). Maroon diamonds represent the pooled estimate of the ASIR, overall and by sex (width denotes 95% CI). Although not statistically significant, the pooled ASIR of colorectal cancer in Africa was higher in males ( $I^2=39$ ) than in females ( $I^2=37$ ). P for interaction comparing the different subgroups =0.37.

**Figure 3: Overall ASIR (per 100,000 population) of colorectal cancer in Africa stratified by United Nations region (North Africa and sub-Saharan Africa).** Event values represent the age-standardized incidence rates of colorectal cancer per 100,000 population. Blue squares and their corresponding lines are the point estimates and 95% confidence intervals (95% CI). Maroon diamonds represent the pooled estimate of the ASIR, overall and by United Nations regions (width denotes 95% CI). Although not statistically significant, the pooled ASIR of colorectal cancer in Africa was higher in North Africa ( $I^2=76$ ) than SSA ( $I^2=45$ ). P for interaction comparing the different subgroups =0.21.

**Figure 4: ASIR (per 100,000 population) of colorectal cancer in Africa stratified by United Nations subregions (Northern, Western, Eastern, and Southern Africa).** Event values represent the age-standardized incidence rates of colorectal cancer per 100,000 population. Blue squares and their corresponding lines are the point estimates and 95% confidence intervals (95% CI). Maroon diamonds represent the pooled estimate of the ASIR, overall and by United Nations subregion (width denotes 95% CI).

1  
2  
3  
4  
5 **Figure 5:** ASIR (per 100,000 population) of colorectal cancer in Africa stratified by year of study (Before  
6 2000 and 2000 and after). Event values represent the age-standardized incidence rates of colorectal cancer  
7 per 100,000 population. Blue squares and their corresponding lines are the point estimates and 95%  
8 confidence intervals (95% CI). Maroon diamonds represent the pooled estimate of the ASIR, overall and  
9 by year categorized as before and after 2000 (width denotes 95% CI). There is no difference in the rates  
10 between the year categories.  
11  
12  
13  
14  
15  
16  
17  
18  
19

20 **Figure 6: Temporal trends in the incidence rates (per 100,000 population) of colorectal cancer in**  
21 **Africa.** Rates were constant over time.  
22  
23  
24  
25  
26  
27  
28  
29  
30  
31  
32  
33  
34  
35  
36  
37  
38  
39  
40  
41  
42  
43  
44  
45  
46  
47  
48  
49  
50  
51  
52  
53  
54  
55  
56  
57  
58  
59  
60



## REFERENCES

1. Bray F, Ferlay J, Soerjomataram I, et al. Global cancer statistics 2018: GLOBOCAN estimates of incidence and mortality worldwide for 36 cancers in 185 countries. *CA: a cancer journal for clinicians* 2018;68(6):394-424.
2. Arnold M, Sierra MS, Laversanne M, et al. Global patterns and trends in colorectal cancer incidence and mortality. *Gut* 2017;66(4):683-91.
3. Negin J, Cumming R, de Ramirez SS, et al. Risk factors for non-communicable diseases among older adults in rural Africa. *Tropical Medicine & International Health* 2011;16(5):640-46.
4. Anoba IB. How a population of 4.2 billion could impact Africa by 2100: the possible economic. *The SAIS Review of International Affairs* 2019
5. Graham A, Davies Adeloeye LG, Theodoratou E, et al. Estimating the incidence of colorectal cancer in Sub-Saharan Africa: A systematic analysis. *Journal of global health* 2012;2(2)
6. Parkin DM, Bray F, Ferlay J, et al. Cancer in africa 2012. *Cancer Epidemiology and Prevention Biomarkers* 2014;23(6):953-66.
7. Stroup DF, Berlin JA, Morton SC, et al. Meta-analysis of observational studies in epidemiology: a proposal for reporting. *Jama* 2000;283(15):2008-12.
8. Moher D, Liberati A, Tetzlaff J, et al. Preferred reporting items for systematic reviews and meta-analyses: the PRISMA statement. *PLoS med* 2009;6(7):e1000097.
9. Peterson J, Welch V, Losos M, et al. The Newcastle-Ottawa scale (NOS) for assessing the quality of nonrandomised studies in meta-analyses. *Ottawa: Ottawa Hospital Research Institute* 2011
10. Parkin D. Comparability and quality control in cancer registration. *IARC Technical Report* 1994;19:18-19.
11. Schwarzer G, Carpenter JR, Rücker G. Meta-analysis with R: Springer 2015.
12. DerSimonian R, Kacker R. Random-effects model for meta-analysis of clinical trials: an update. *Contemporary clinical trials* 2007;28(2):105-14.
13. Higgins JP, Thompson SG, Deeks JJ, et al. Measuring inconsistency in meta-analyses. *Bmj* 2003;327(7414):557-60.
14. Egger M, Smith GD, Schneider M, et al. Bias in meta-analysis detected by a simple, graphical test. *Bmj* 1997;315(7109):629-34.
15. Wentink M, Räckers M, Stupart D, et al. Incidence and histological features of colorectal cancer in the Northern Cape Province, South Africa. *South African Journal of Surgery* 2010;48(4):109-13.
16. Somdya NI, Bradshaw D, Gelderblom WC, et al. Cancer incidence in a rural population of South Africa, 1998–2002. *International Journal of Cancer* 2010;127(10):2420-29.
17. Chokunonga E, Levy L, Bassett M, et al. Cancer incidence in the African population of Harare, Zimbabwe: second results from the cancer registry 1993–1995. *International journal of cancer* 2000;85(1):54-59.
18. Bassett M, Chokunonga E, Mauchaza B, et al. Cancer in the African population of Harare, Zimbabwe, 1990–1992. *International journal of cancer* 1995;63(1):29-36.

19. Laryea DO, Awuah B, Amoako YA, et al. Cancer incidence in Ghana, 2012: evidence from a population-based cancer registry. *BMC cancer* 2014;14(1):1-8.
20. Medhin LB, Achila OO, Abrham AT, et al. Incidence of colorectal cancer in Eritrea: Data from the National Health Laboratory, 2011-2017. *PloS one* 2019;14(11):e0224045.
21. Bah E, Parkin D, Hall A, et al. Cancer in the Gambia: 1988–97. *British journal of cancer* 2001;84(9):1207-14.
22. Koulibaly M, Kabba IS, Cissé A, et al. Cancer incidence in Conakry, Guinea: first results from the Cancer Registry 1992–1995. *International Journal of Cancer* 1997;70(1):39-45.
23. Echimane AK, Ahnoux AA, Adoubi I, et al. Cancer incidence in Abidjan, Ivory Coast: first results from the cancer registry, 1995–1997. *Cancer* 2000;89(3):653-63.
24. Bayo S, Parkin DM, Koumare A, et al. Cancer in Mali, 1987–1988. *International Journal of Cancer* 1990;45(4):679-84.
25. Banda L, Parkin D, Dzamalala C, et al. Cancer incidence in Blantyre, Malawi 1994–1998. *Tropical Medicine & International Health* 2001;6(4):296-304.
26. Missaoui N, Jaidaine L, Abdelkader AB, et al. Colorectal cancer in central Tunisia: increasing incidence trends over a 15-year period. *Asian Pac J Cancer Prev* 2011;12(4):1073-76.
27. Wabinga H, Parkin D, Wabwire-Mangen F, et al. Trends in cancer incidence in Kyadondo County, Uganda, 1960–1997. *British journal of cancer* 2000;82(9):1585-92.
28. Saeed IE, Weng HY, Mohamed KH, et al. Cancer incidence in Khartoum, Sudan: first results from the Cancer Registry, 2009–2010. *Cancer medicine* 2014;3(4):1075-84.
29. Siegel RL, Miller KD, Jemal A. Cancer statistics, 2015. *CA: a cancer journal for clinicians* 2015;65(1):5-29.
30. Agyemang-Yeboah F, Yorke J, Obirikorang C, et al. Patterns and presentations of colorectal cancer at Komfo-Anokye teaching hospital Kumasi, Ghana. *Pan African Medical Journal* 2017;28(1):142.
31. Irabor D, Adedeji O. Colorectal cancer in Nigeria: 40 years on. A review. *European journal of cancer care* 2009;18(2):110-15.
32. Mauri G, Sartore-Bianchi A, Russo AG, et al. Early-onset colorectal cancer in young individuals. *Molecular oncology* 2019;13(2):109-31.
33. Gu M, Thapa S. Colorectal cancer in the United States and a review of its heterogeneity among Asian American subgroups. *Asia-Pacific Journal of Clinical Oncology* 2020;16(4):193-200.
34. Bailey CE, Hu C-Y, You YN, et al. Increasing disparities in the age-related incidences of colon and rectal cancers in the United States, 1975-2010. *JAMA surgery* 2015;150(1):17-22.
35. Jackson CS, Oman M, Patel AM, et al. Health disparities in colorectal cancer among racial and ethnic minorities in the United States. *Journal of gastrointestinal oncology* 2016;7(Suppl 1):S32.
36. Ou J, Carbonero F, Zoetendal EG, et al. Diet, microbiota, and microbial metabolites in colon cancer risk in rural Africans and African Americans. *The American journal of clinical nutrition* 2013;98(1):111-20.
37. Sharma I, Kim S, Sridhar S, et al. Colorectal cancer: an emphasis on factors influencing racial/ethnic disparities. *Critical Reviews™ in Oncogenesis* 2020;25(2)
38. Laiyemo AO, Brawley O, Irabor D, et al. Towards colorectal cancer control in Africa. *International journal of cancer Journal international du cancer* 2016;138(4):1033.

1  
2  
3  
4  
5  
6  
7  
8  
9  
10  
11  
12  
13  
14  
15  
16  
17  
18  
19  
20  
21  
22  
23  
24  
25  
26  
27  
28  
29  
30  
31  
32  
33  
34  
35  
36  
37  
38  
39  
40  
41  
42  
43  
44  
45  
46  
47  
48  
49  
50  
51  
52  
53  
54  
55  
56  
57  
58  
59  
60

39. Omonisi AE, Liu B, Parkin DM. Population-Based Cancer Registration in Sub-Saharan Africa: Its Role in Research and Cancer Control. *JCO Global Oncology* 2020;6

For peer review only

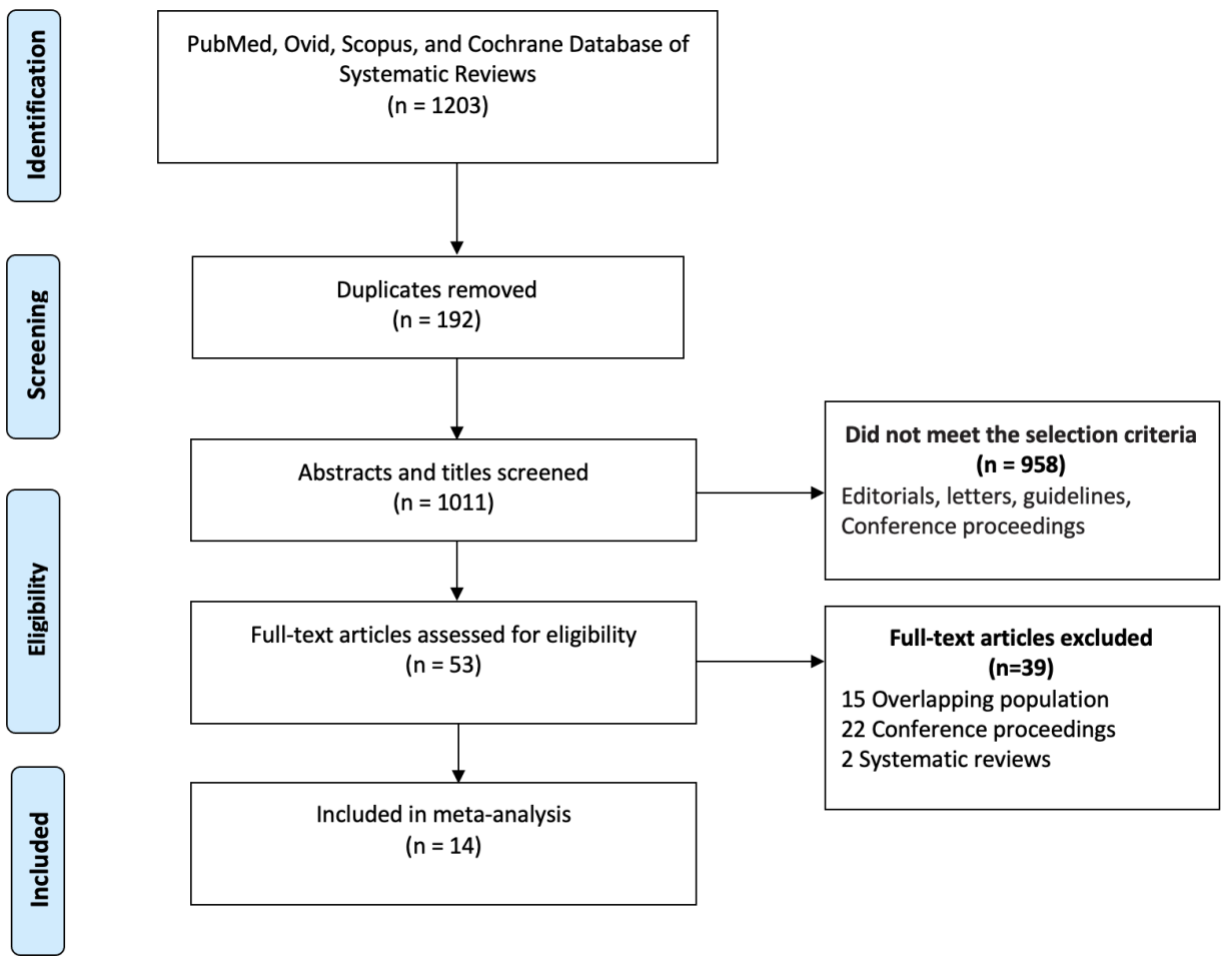

only

1  
2  
3  
4  
5  
6  
7  
8  
9  
10  
11  
12  
13  
14  
15  
16  
17  
18  
19  
20  
21  
22  
23  
24  
25  
26  
27  
28  
29  
30  
31  
32  
33  
34  
35  
36  
37  
38  
39  
40  
41  
42  
43  
44  
45  
46  
47  
48  
49  
50  
51  
52  
53  
54  
55  
56  
57  
58  
59  
60

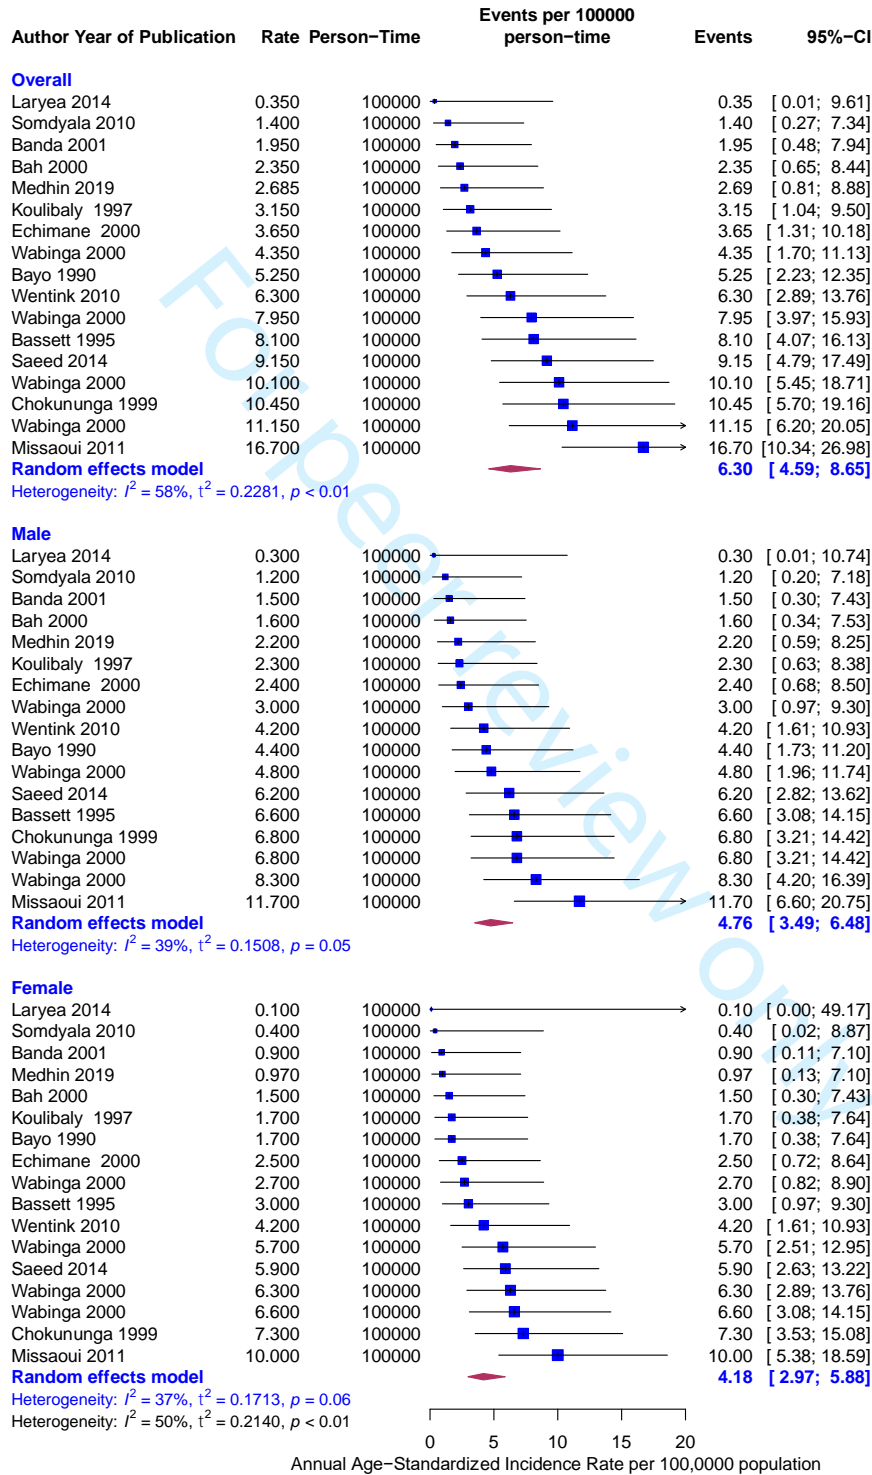

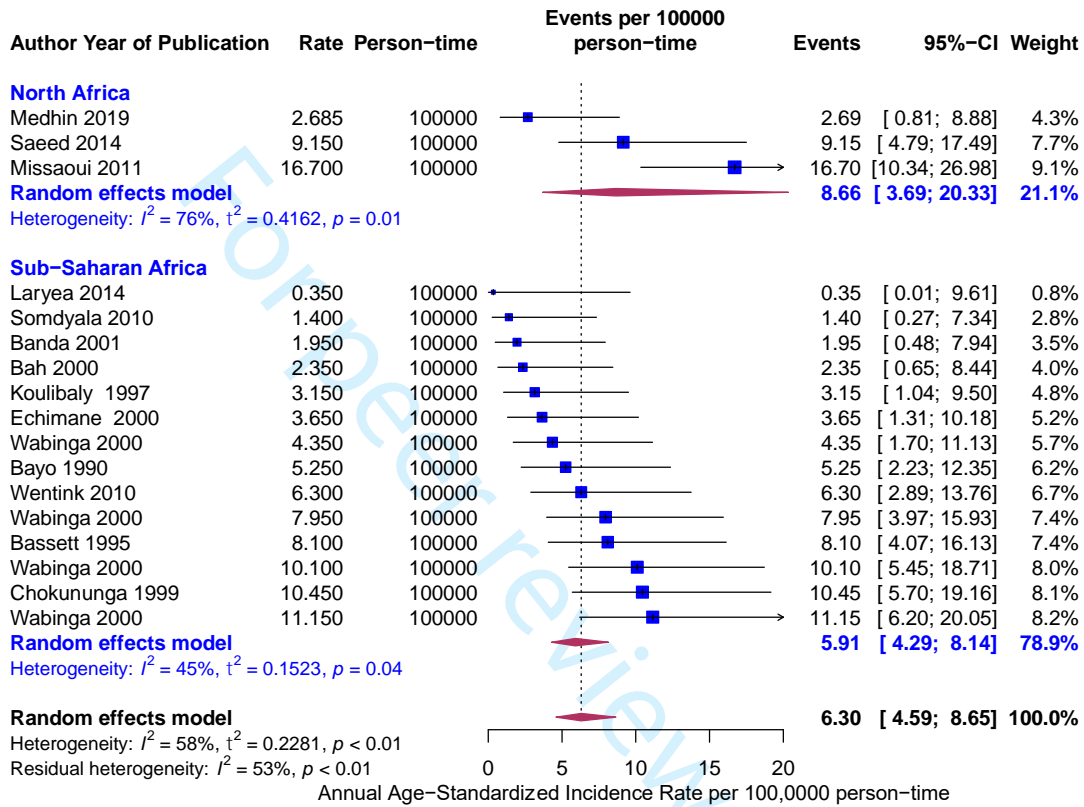

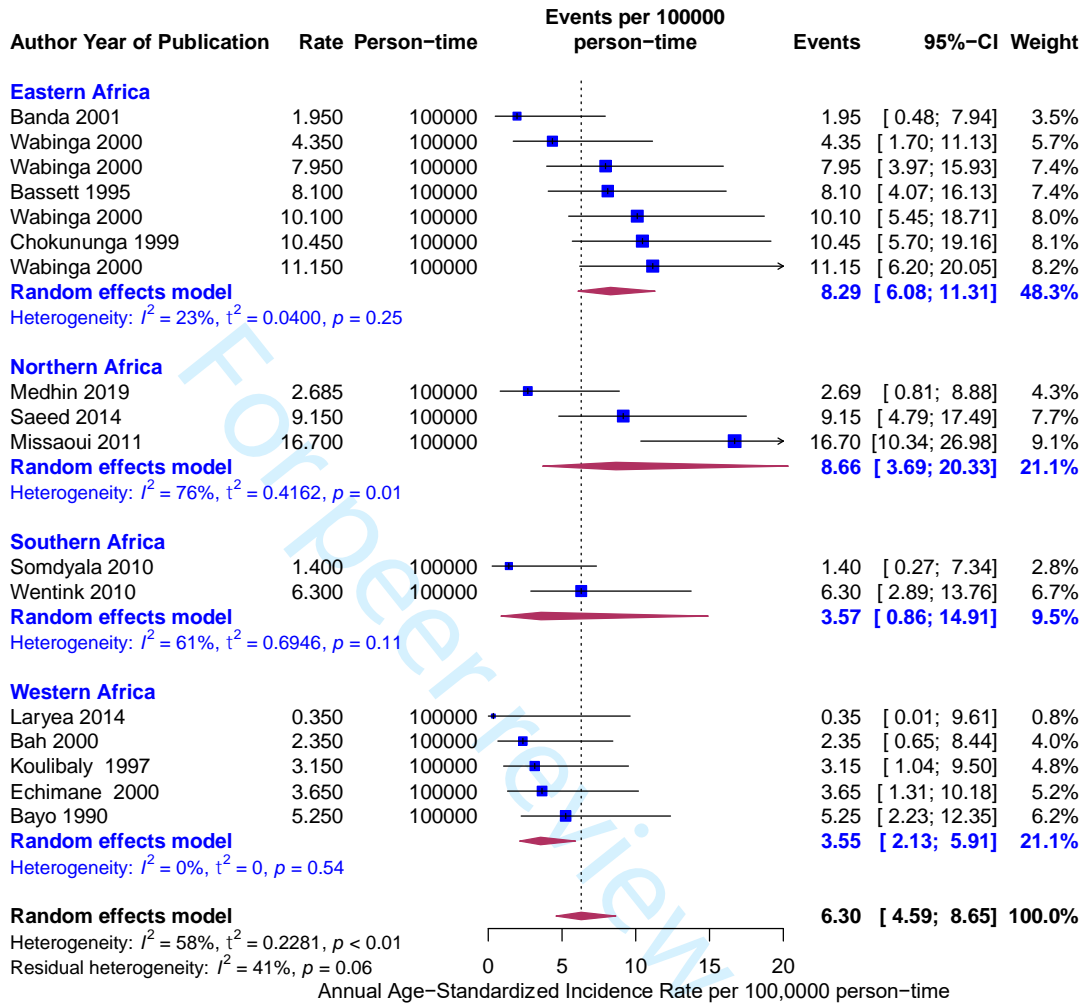

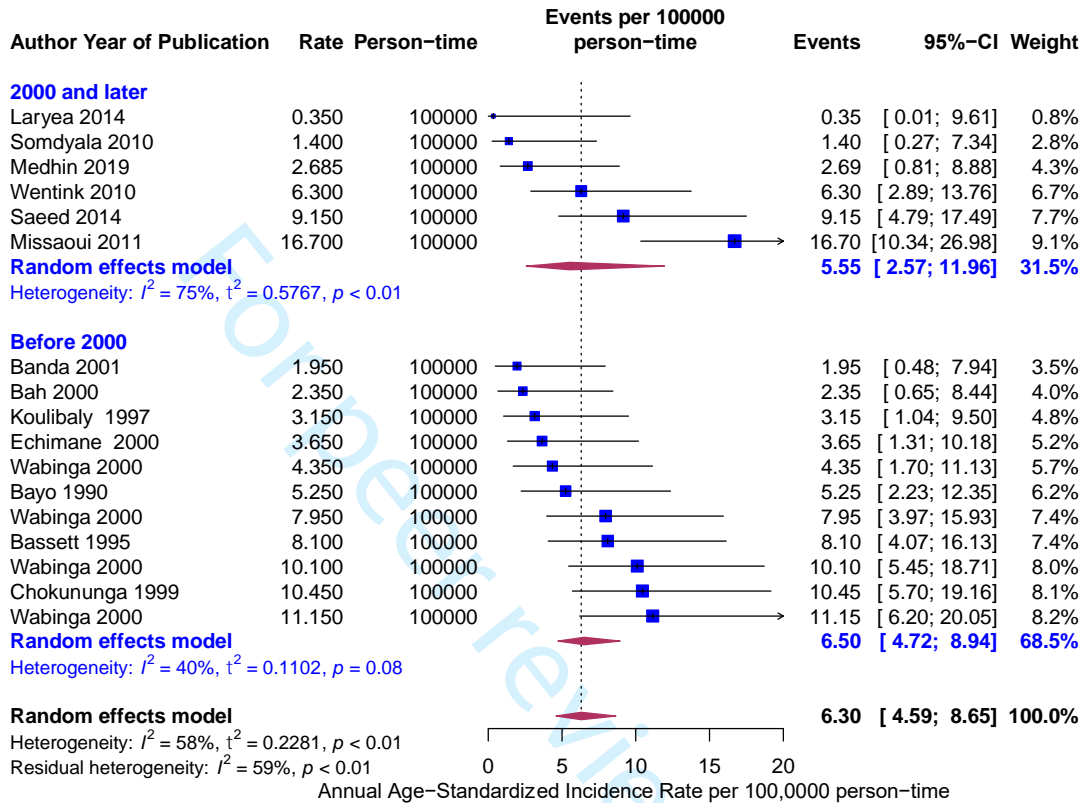



# Temporal Trend

1  
2  
3  
4  
5  
6  
7  
8  
9  
10  
11  
12  
13  
14  
15  
16  
17  
18  
19  
20  
21  
22  
23  
24  
25  
26  
27  
28  
29  
30  
31  
32  
33  
34  
35  
36  
37  
38  
39  
40  
41  
42  
43  
44

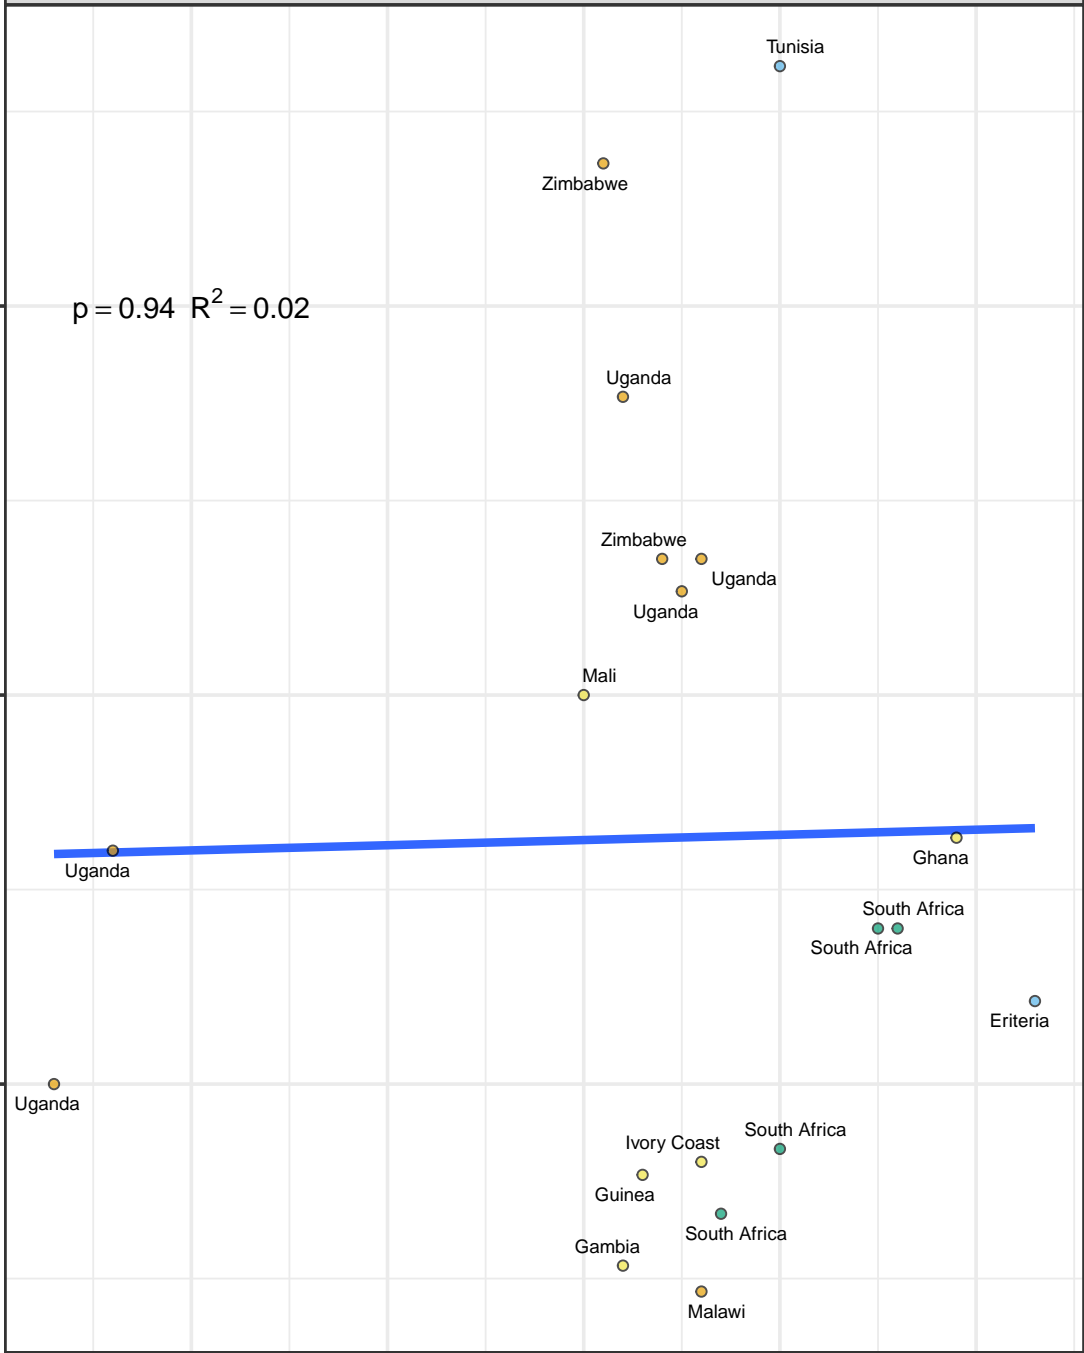

- UN Region
- Eastern Africa
  - Northern Africa
  - Southern Africa
  - Western Africa

**SUPPLEMENTARY MATERIAL FOR THE MANUSCRIPT****Age-standardized incidence rate and epidemiology of colorectal cancer in Africa:  
a systematic review and meta-analysis**

Nina D. Arhin, MD<sup>1\*</sup>, Paddy Ssentongo, MD, MPH, PhD<sup>2,3\*</sup>, Morris Taylor<sup>4</sup>, Elizabeth J. Olecki, MD<sup>5</sup>, Colette Pameijer, MD, FACS<sup>5</sup>, Chan Shen, PhD<sup>5</sup>, John Oh, MD, FACS<sup>5</sup>, Cathy Eng, MD, FACP, FASCO<sup>1</sup>

<sup>1</sup>Department of Medicine, Division of Hematology/Oncology, Vanderbilt University Medical Center, Nashville, Tennessee, United States of America

<sup>2</sup>Department of Public Health Sciences, Penn State College of Medicine and Milton S. Hershey Medical Center, Hershey, Pennsylvania, United States of America

<sup>3</sup>Center for Neural Engineering, Department of Engineering, Science and Mechanics, The Pennsylvania State University, Pennsylvania, United States of America

<sup>4</sup>Penn State College of Medicine, Hershey, Pennsylvania, United States of America

<sup>5</sup>Department of Surgery, Division of Trauma Surgery, Penn State College of Medicine and Milton S. Hershey Medical Center, Hershey, Pennsylvania, United States of America

Contributed equally as co-first authors

**To whom correspondence should be addressed:**

Paddy Ssentongo, MD, MPH, PhD  
500 University Drive  
Penn State College of Medicine  
Hershey PA, 17033 USA  
814-777-2741

[pssentongo@pennstatehealth.psu.edu](mailto:pssentongo@pennstatehealth.psu.edu)

**Running head:** Colorectal cancer in Africa: a meta-analysis

### Search terms used in PubMed (MEDLINE)

1. ((colon cancer[MeSH Terms]) OR (Colorectal Cancer) OR (rectal cancer[MeSH Terms])) OR (colorectal carcinoma[MeSH Terms]))
2. (Epidemiology[MeSH Terms])) OR (Incidence[MeSH Terms])) OR (Prevalence[MeSH Terms]))]
3. (Africa OR Africa South of the Sahara OR Angola OR Benin OR Botswana OR Burkina Faso OR Burundi OR Cameroun OR Cameroon OR Cape Verde OR Chad OR Central African Republic of Comoros OR Congo OR Cote d'Ivoire OR Democratic Republic of the Congo OR Equatorial Guinea OR Eritrea OR Ethiopia OR Gabon OR Gambia OR Ghana OR Guinea OR Guinea Bissau OR Kenya OR Lesotho OR Liberia OR Madagascar OR Malawi OR Mali OR Mozambique OR Namibia OR Niger OR Nigeria OR Rwanda OR Sao Tome OR Senegal OR Seychelles OR Sierra Leone OR Somalia OR South Africa OR Swaziland OR Togo OR Uganda OR Tanzania OR Zambia OR Zimbabwe OR Africa, Northern, OR Algeria OR Egypt OR Libya OR Morocco OR Tunisia OR western Sahara OR South Africa OR Africa, Western OR Africa, Southern OR Africa, Northern OR Africa, Eastern OR Africa, Central)
4. 1 AND 2 AND 3

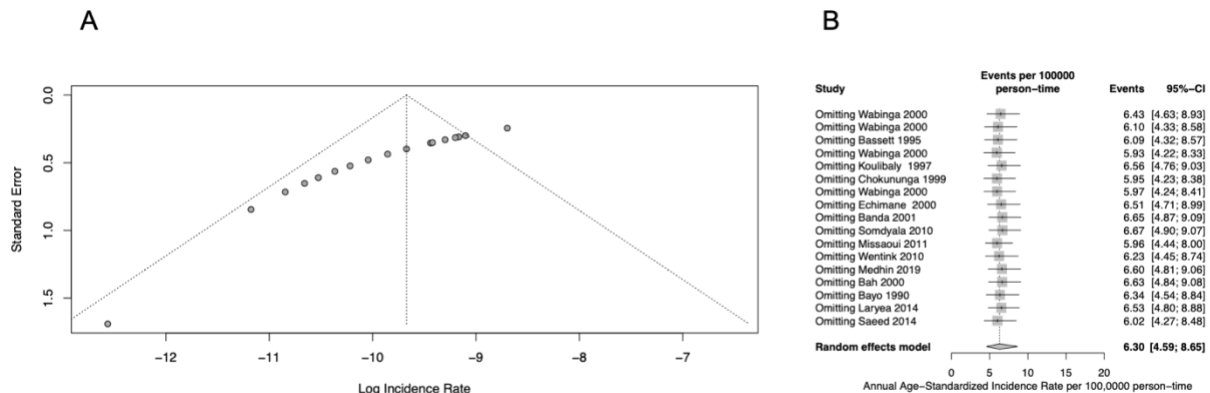

**Supplemental Figure 1: Publication bias and sensitivity analyses.** Funnel plot was not interpretable (A). Influence analysis shows no significant change from any of the pooled estimates observed when other studies were removed in turn. The pooled ASIR ranged from 5.93 to 6.67 (B)

| Section and Topic             | Item # | Checklist item                                                                                                                                                                                                                                                                                       | Location where item is reported |
|-------------------------------|--------|------------------------------------------------------------------------------------------------------------------------------------------------------------------------------------------------------------------------------------------------------------------------------------------------------|---------------------------------|
| <b>TITLE</b>                  |        |                                                                                                                                                                                                                                                                                                      |                                 |
| Title                         | 1      | Identify the report as a systematic review.                                                                                                                                                                                                                                                          | 1                               |
| <b>ABSTRACT</b>               |        |                                                                                                                                                                                                                                                                                                      |                                 |
| Abstract                      | 2      | See the PRISMA 2020 for Abstracts checklist.                                                                                                                                                                                                                                                         | 2                               |
| <b>INTRODUCTION</b>           |        |                                                                                                                                                                                                                                                                                                      |                                 |
| Rationale                     | 3      | Describe the rationale for the review in the context of existing knowledge.                                                                                                                                                                                                                          | 4                               |
| Objectives                    | 4      | Provide an explicit statement of the objective(s) or question(s) the review addresses.                                                                                                                                                                                                               | 4                               |
| <b>METHODS</b>                |        |                                                                                                                                                                                                                                                                                                      |                                 |
| Eligibility criteria          | 5      | Specify the inclusion and exclusion criteria for the review and how studies were grouped for the syntheses.                                                                                                                                                                                          | 5                               |
| Information sources           | 6      | Specify all databases, registers, websites, organisations, reference lists and other sources searched or consulted to identify studies. Specify the date when each source was last searched or consulted.                                                                                            | 5                               |
| Search strategy               | 7      | Present the full search strategies for all databases, registers and websites, including any filters and limits used.                                                                                                                                                                                 | 5                               |
| Selection process             | 8      | Specify the methods used to decide whether a study met the inclusion criteria of the review, including how many reviewers screened each record and each report retrieved, whether they worked independently, and if applicable, details of automation tools used in the process.                     | 6                               |
| Data collection process       | 9      | Specify the methods used to collect data from reports, including how many reviewers collected data from each report, whether they worked independently, any processes for obtaining or confirming data from study investigators, and if applicable, details of automation tools used in the process. | 6                               |
| Data items                    | 10a    | List and define all outcomes for which data were sought. Specify whether all results that were compatible with each outcome domain in each study were sought (e.g. for all measures, time points, analyses), and if not, the methods used to decide which results to collect.                        | 6                               |
|                               | 10b    | List and define all other variables for which data were sought (e.g. participant and intervention characteristics, funding sources). Describe any assumptions made about any missing or unclear information.                                                                                         | 6                               |
| Study risk of bias assessment | 11     | Specify the methods used to assess risk of bias in the included studies, including details of the tool(s) used, how many reviewers assessed each study and whether they worked independently, and if applicable, details of automation tools used in the process.                                    | 6                               |
| Effect measures               | 12     | Specify for each outcome the effect measure(s) (e.g. risk ratio, mean difference) used in the synthesis or presentation of results.                                                                                                                                                                  | 7                               |
| Synthesis methods             | 13a    | Describe the processes used to decide which studies were eligible for each synthesis (e.g. tabulating the study intervention characteristics and comparing against the planned groups for each synthesis (item #5)).                                                                                 | 7                               |
|                               | 13b    | Describe any methods required to prepare the data for presentation or synthesis, such as handling of missing summary statistics,                                                                                                                                                                     | 7                               |

| Section and Topic             | Item # | Checklist item                                                                                                                                                                                                                                                                       | Location where item is reported |
|-------------------------------|--------|--------------------------------------------------------------------------------------------------------------------------------------------------------------------------------------------------------------------------------------------------------------------------------------|---------------------------------|
|                               |        | or data conversions.                                                                                                                                                                                                                                                                 |                                 |
|                               | 13c    | Describe any methods used to tabulate or visually display results of individual studies and syntheses.                                                                                                                                                                               | 7                               |
|                               | 13d    | Describe any methods used to synthesize results and provide a rationale for the choice(s). If meta-analysis was performed, describe the model(s), method(s) to identify the presence and extent of statistical heterogeneity, and software package(s) used.                          |                                 |
|                               | 13e    | Describe any methods used to explore possible causes of heterogeneity among study results (e.g. subgroup analysis, meta-regression).                                                                                                                                                 | 7                               |
|                               | 13f    | Describe any sensitivity analyses conducted to assess robustness of the synthesized results.                                                                                                                                                                                         | 7                               |
| Reporting bias assessment     | 14     | Describe any methods used to assess risk of bias due to missing results in a synthesis (arising from reporting biases).                                                                                                                                                              | 7                               |
| Certainty assessment          | 15     | Describe any methods used to assess certainty (or confidence) in the body of evidence for an outcome.                                                                                                                                                                                | 7                               |
| <b>RESULTS</b>                |        |                                                                                                                                                                                                                                                                                      |                                 |
| Study selection               | 16a    | Describe the results of the search and selection process, from the number of records identified in the search to the number of studies included in the review, ideally using a flow diagram.                                                                                         | 8-16                            |
|                               | 16b    | Cite studies that might appear to meet the inclusion criteria, but which were excluded, and explain why they were excluded.                                                                                                                                                          | 8                               |
| Study characteristics         | 17     | Cite each included study and present its characteristics.                                                                                                                                                                                                                            | 8                               |
| Risk of bias in studies       | 18     | Present assessments of risk of bias for each included study.                                                                                                                                                                                                                         | 8-16                            |
| Results of individual studies | 19     | For all outcomes, present, for each study: (a) summary statistics for each group (where appropriate) and (b) an effect estimate and its precision (e.g. confidence/credible interval), ideally using structured tables or plots.                                                     | 8-16                            |
| Results of syntheses          | 20a    | For each synthesis, briefly summarise the characteristics and risk of bias among contributing studies.                                                                                                                                                                               | 8-16                            |
|                               | 20b    | Present results of all statistical syntheses conducted. If meta-analysis was done, present for each the summary estimate and its precision (e.g. confidence/credible interval) and measures of statistical heterogeneity. If comparing groups, describe the direction of the effect. | 8-16                            |
|                               | 20c    | Present results of all investigations of possible causes of heterogeneity among study results.                                                                                                                                                                                       | 8-16                            |
|                               | 20d    | Present results of all sensitivity analyses conducted to assess the robustness of the synthesized results.                                                                                                                                                                           | 8-16                            |
| Reporting biases              | 21     | Present assessments of risk of bias due to missing results (arising from reporting biases) for each synthesis assessed.                                                                                                                                                              | 8-16                            |
| Certainty of evidence         | 22     | Present assessments of certainty (or confidence) in the body of evidence for each outcome assessed.                                                                                                                                                                                  | 8-16                            |

| Section and Topic                              | Item # | Checklist item                                                                                                                                                                                                                             | Location where item is reported |
|------------------------------------------------|--------|--------------------------------------------------------------------------------------------------------------------------------------------------------------------------------------------------------------------------------------------|---------------------------------|
| <b>DISCUSSION</b>                              |        |                                                                                                                                                                                                                                            |                                 |
| Discussion                                     | 23a    | Provide a general interpretation of the results in the context of other evidence.                                                                                                                                                          | 18-21                           |
|                                                | 23b    | Discuss any limitations of the evidence included in the review.                                                                                                                                                                            | 18-21                           |
|                                                | 23c    | Discuss any limitations of the review processes used.                                                                                                                                                                                      | 18-21                           |
|                                                | 23d    | Discuss implications of the results for practice, policy, and future research.                                                                                                                                                             | 20                              |
| <b>OTHER INFORMATION</b>                       |        |                                                                                                                                                                                                                                            |                                 |
| Registration and protocol                      | 24a    | Provide registration information for the review, including register name and registration number, or state that the review was not registered.                                                                                             | 5                               |
|                                                | 24b    | Indicate where the review protocol can be accessed, or state that a protocol was not prepared.                                                                                                                                             | 5                               |
|                                                | 24c    | Describe and explain any amendments to information provided at registration or in the protocol.                                                                                                                                            | NA                              |
| Support                                        | 25     | Describe sources of financial or non-financial support for the review, and the role of the funders or sponsors in the review.                                                                                                              | 22                              |
| Competing interests                            | 26     | Declare any competing interests of review authors.                                                                                                                                                                                         | 22                              |
| Availability of data, code and other materials | 27     | Report which of the following are publicly available and where they can be found: template data collection forms; data extracted from included studies; data used for all analyses; analytic code; any other materials used in the review. | 22                              |

**Supplemental Table 1: PRISMA checklist**

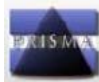

## PRISMA 2020 Checklist

| Section and Topic             | Item # | Checklist item                                                                                                                                                                                                                                                                                       | Location where item is reported |
|-------------------------------|--------|------------------------------------------------------------------------------------------------------------------------------------------------------------------------------------------------------------------------------------------------------------------------------------------------------|---------------------------------|
| <b>TITLE</b>                  |        |                                                                                                                                                                                                                                                                                                      |                                 |
| Title                         | 1      | Identify the report as a systematic review.                                                                                                                                                                                                                                                          | 1                               |
| <b>ABSTRACT</b>               |        |                                                                                                                                                                                                                                                                                                      |                                 |
| Abstract                      | 2      | See the PRISMA 2020 for Abstracts checklist.                                                                                                                                                                                                                                                         | 2                               |
| <b>INTRODUCTION</b>           |        |                                                                                                                                                                                                                                                                                                      |                                 |
| Rationale                     | 3      | Describe the rationale for the review in the context of existing knowledge.                                                                                                                                                                                                                          | 4                               |
| Objectives                    | 4      | Provide an explicit statement of the objective(s) or question(s) the review addresses.                                                                                                                                                                                                               | 4                               |
| <b>METHODS</b>                |        |                                                                                                                                                                                                                                                                                                      |                                 |
| Eligibility criteria          | 5      | Specify the inclusion and exclusion criteria for the review and how studies were grouped for the syntheses.                                                                                                                                                                                          | 5                               |
| Information sources           | 6      | Specify all databases, registers, websites, organisations, reference lists and other sources searched or consulted to identify studies. Specify the date when each source was last searched or consulted.                                                                                            | 5                               |
| Search strategy               | 7      | Present the full search strategies for all databases, registers and websites, including any filters and limits used.                                                                                                                                                                                 | 5                               |
| Selection process             | 8      | Specify the methods used to decide whether a study met the inclusion criteria of the review, including how many reviewers screened each record and each report retrieved, whether they worked independently, and if applicable, details of automation tools used in the process.                     | 6                               |
| Data collection process       | 9      | Specify the methods used to collect data from reports, including how many reviewers collected data from each report, whether they worked independently, any processes for obtaining or confirming data from study investigators, and if applicable, details of automation tools used in the process. | 6                               |
| Data items                    | 10a    | List and define all outcomes for which data were sought. Specify whether all results that were compatible with each outcome domain in each study were sought (e.g. for all measures, time points, analyses), and if not, the methods used to decide which results to collect.                        | 6                               |
|                               | 10b    | List and define all other variables for which data were sought (e.g. participant and intervention characteristics, funding sources). Describe any assumptions made about any missing or unclear information.                                                                                         | 6                               |
| Study risk of bias assessment | 11     | Specify the methods used to assess risk of bias in the included studies, including details of the tool(s) used, how many reviewers assessed each study and whether they worked independently, and if applicable, details of automation tools used in the process.                                    | 6                               |
| Effect measures               | 12     | Specify for each outcome the effect measure(s) (e.g. risk ratio, mean difference) used in the synthesis or presentation of results.                                                                                                                                                                  | 7                               |
| Synthesis methods             | 13a    | Describe the processes used to decide which studies were eligible for each synthesis (e.g. tabulating the study intervention characteristics and comparing against the planned groups for each synthesis (item #5)).                                                                                 | 7                               |
|                               | 13b    | Describe any methods required to prepare the data for presentation or synthesis, such as handling of missing summary statistics, or data conversions.                                                                                                                                                | 7                               |
|                               | 13c    | Describe any methods used to tabulate or visually display results of individual studies and syntheses.                                                                                                                                                                                               | 7                               |
|                               | 13d    | Describe any methods used to synthesize results and provide a rationale for the choice(s). If meta-analysis was performed, describe the model(s), method(s) to identify the presence and extent of statistical heterogeneity, and software package(s) used.                                          |                                 |
|                               | 13e    | Describe any methods used to explore possible causes of heterogeneity among study results (e.g. subgroup analysis, meta-regression).                                                                                                                                                                 | 7                               |
|                               | 13f    | Describe any sensitivity analyses conducted to assess robustness of the synthesized results.                                                                                                                                                                                                         | 7                               |
| Reporting bias assessment     | 14     | Describe any methods used to assess risk of bias due to missing results in a synthesis (arising from reporting biases).                                                                                                                                                                              | 7                               |
| Certainty                     | 15     | Describe any methods used to assess certainty (or confidence) in the body of evidence for an outcome.                                                                                                                                                                                                | 7                               |

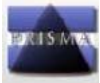

## PRISMA 2020 Checklist

| Section and Topic                              | Item # | Checklist item                                                                                                                                                                                                                                                                       | Location where item is reported |
|------------------------------------------------|--------|--------------------------------------------------------------------------------------------------------------------------------------------------------------------------------------------------------------------------------------------------------------------------------------|---------------------------------|
| assessment                                     |        |                                                                                                                                                                                                                                                                                      |                                 |
| <b>RESULTS</b>                                 |        |                                                                                                                                                                                                                                                                                      |                                 |
| Study selection                                | 16a    | Describe the results of the search and selection process, from the number of records identified in the search to the number of studies included in the review, ideally using a flow diagram.                                                                                         | 8-16                            |
|                                                | 16b    | Cite studies that might appear to meet the inclusion criteria, but which were excluded, and explain why they were excluded.                                                                                                                                                          | 8                               |
| Study characteristics                          | 17     | Cite each included study and present its characteristics.                                                                                                                                                                                                                            | 8                               |
| Risk of bias in studies                        | 18     | Present assessments of risk of bias for each included study.                                                                                                                                                                                                                         | 8-16                            |
| Results of individual studies                  | 19     | For all outcomes, present, for each study: (a) summary statistics for each group (where appropriate) and (b) an effect estimate and its precision (e.g. confidence/credible interval), ideally using structured tables or plots.                                                     | 8-16                            |
| Results of syntheses                           | 20a    | For each synthesis, briefly summarise the characteristics and risk of bias among contributing studies.                                                                                                                                                                               | 8-16                            |
|                                                | 20b    | Present results of all statistical syntheses conducted. If meta-analysis was done, present for each the summary estimate and its precision (e.g. confidence/credible interval) and measures of statistical heterogeneity. If comparing groups, describe the direction of the effect. | 8-16                            |
|                                                | 20c    | Present results of all investigations of possible causes of heterogeneity among study results.                                                                                                                                                                                       | 8-16                            |
|                                                | 20d    | Present results of all sensitivity analyses conducted to assess the robustness of the synthesized results.                                                                                                                                                                           | 8-16                            |
| Reporting biases                               | 21     | Present assessments of risk of bias due to missing results (arising from reporting biases) for each synthesis assessed.                                                                                                                                                              | 8-16                            |
| Certainty of evidence                          | 22     | Present assessments of certainty (or confidence) in the body of evidence for each outcome assessed.                                                                                                                                                                                  | 8-16                            |
| <b>DISCUSSION</b>                              |        |                                                                                                                                                                                                                                                                                      |                                 |
| Discussion                                     | 23a    | Provide a general interpretation of the results in the context of other evidence.                                                                                                                                                                                                    | 18-21                           |
|                                                | 23b    | Discuss any limitations of the evidence included in the review.                                                                                                                                                                                                                      | 18-21                           |
|                                                | 23c    | Discuss any limitations of the review processes used.                                                                                                                                                                                                                                | 18-21                           |
|                                                | 23d    | Discuss implications of the results for practice, policy, and future research.                                                                                                                                                                                                       | 20                              |
| <b>OTHER INFORMATION</b>                       |        |                                                                                                                                                                                                                                                                                      |                                 |
| Registration and protocol                      | 24a    | Provide registration information for the review, including register name and registration number, or state that the review was not registered.                                                                                                                                       | 5                               |
|                                                | 24b    | Indicate where the review protocol can be accessed, or state that a protocol was not prepared.                                                                                                                                                                                       | 5                               |
|                                                | 24c    | Describe and explain any amendments to information provided at registration or in the protocol.                                                                                                                                                                                      | NA                              |
| Support                                        | 25     | Describe sources of financial or non-financial support for the review, and the role of the funders or sponsors in the review.                                                                                                                                                        | 22                              |
| Competing interests                            | 26     | Declare any competing interests of review authors.                                                                                                                                                                                                                                   | 22                              |
| Availability of data, code and other materials | 27     | Report which of the following are publicly available and where they can be found: template data collection forms; data extracted from included studies; data used for all analyses; analytic code; any other materials used in the review.                                           | 22                              |



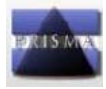

## PRISMA 2020 Checklist

For more information, visit: <http://www.prisma-statement.org/>

For peer review only

1  
2  
3  
4  
5  
6  
7  
8  
9  
10  
11  
12  
13  
14  
15  
16  
17  
18  
19  
20  
21  
22  
23  
24  
25  
26  
27  
28  
29  
30  
31  
32  
33  
34  
35  
36  
37  
38  
39  
40  
41  
42  
43  
44  
45  
46  
47

# BMJ Open

## Age-standardized incidence rate and epidemiology of colorectal cancer in Africa: a systematic review and meta-analysis

|                                 |                                                                                                                                                                                                                                                                                                                                                                                                                                                                                                                                                                                                                                                                      |
|---------------------------------|----------------------------------------------------------------------------------------------------------------------------------------------------------------------------------------------------------------------------------------------------------------------------------------------------------------------------------------------------------------------------------------------------------------------------------------------------------------------------------------------------------------------------------------------------------------------------------------------------------------------------------------------------------------------|
| Journal:                        | <i>BMJ Open</i>                                                                                                                                                                                                                                                                                                                                                                                                                                                                                                                                                                                                                                                      |
| Manuscript ID                   | bmjopen-2021-052376.R2                                                                                                                                                                                                                                                                                                                                                                                                                                                                                                                                                                                                                                               |
| Article Type:                   | Original research                                                                                                                                                                                                                                                                                                                                                                                                                                                                                                                                                                                                                                                    |
| Date Submitted by the Author:   | 23-Nov-2021                                                                                                                                                                                                                                                                                                                                                                                                                                                                                                                                                                                                                                                          |
| Complete List of Authors:       | Arhin, Nina; Vanderbilt University Medical Center<br>Ssentongo, Paddy; Penn State Health Milton S Hershey Medical Center, Public Health Science<br>Taylor, Morris; Penn State Health Milton S Hershey Medical Center, Public Health Science<br>Olecki, Elizabeth; Penn State Health Milton S Hershey Medical Center, Public Health Science<br>Pameijer, Colette; Penn State Health Milton S Hershey Medical Center, Public Health Science<br>Shen, Chan; Penn State Health Milton S Hershey Medical Center, Public Health Science<br>Oh, John; Penn State Health Milton S Hershey Medical Center, Trauma Surgery<br>Eng, Cathy; Vanderbilt University Medical Center |
| <b>Primary Subject Heading</b>: | Epidemiology                                                                                                                                                                                                                                                                                                                                                                                                                                                                                                                                                                                                                                                         |
| Secondary Subject Heading:      | Global health, Oncology                                                                                                                                                                                                                                                                                                                                                                                                                                                                                                                                                                                                                                              |
| Keywords:                       | Epidemiology < TROPICAL MEDICINE, Public health < INFECTIOUS DISEASES, Cancer pain < ONCOLOGY                                                                                                                                                                                                                                                                                                                                                                                                                                                                                                                                                                        |
|                                 |                                                                                                                                                                                                                                                                                                                                                                                                                                                                                                                                                                                                                                                                      |

SCHOLARONE™  
Manuscripts



I, the Submitting Author has the right to grant and does grant on behalf of all authors of the Work (as defined in the below author licence), an exclusive licence and/or a non-exclusive licence for contributions from authors who are: i) UK Crown employees; ii) where BMJ has agreed a CC-BY licence shall apply, and/or iii) in accordance with the terms applicable for US Federal Government officers or employees acting as part of their official duties; on a worldwide, perpetual, irrevocable, royalty-free basis to BMJ Publishing Group Ltd ("BMJ") its licensees and where the relevant Journal is co-owned by BMJ to the co-owners of the Journal, to publish the Work in this journal and any other BMJ products and to exploit all rights, as set out in our [licence](#).

The Submitting Author accepts and understands that any supply made under these terms is made by BMJ to the Submitting Author unless you are acting as an employee on behalf of your employer or a postgraduate student of an affiliated institution which is paying any applicable article publishing charge ("APC") for Open Access articles. Where the Submitting Author wishes to make the Work available on an Open Access basis (and intends to pay the relevant APC), the terms of reuse of such Open Access shall be governed by a Creative Commons licence – details of these licences and which [Creative Commons](#) licence will apply to this Work are set out in our licence referred to above.

Other than as permitted in any relevant BMJ Author's Self Archiving Policies, I confirm this Work has not been accepted for publication elsewhere, is not being considered for publication elsewhere and does not duplicate material already published. I confirm all authors consent to publication of this Work and authorise the granting of this licence.

1  
2  
3 **Age-standardized incidence rate and epidemiology of colorectal cancer in Africa: a**  
4 **systematic review and meta-analysis**  
5

6 Nina D. Arhin, MD<sup>1\*</sup>, Paddy Ssentongo, MD, MPH, PhD<sup>2,3\*</sup>, Morris Taylor<sup>4</sup>, Elizabeth J. Olecki,  
7 MD<sup>5</sup>, Colette Pameijer, MD, FACS<sup>5</sup>, Chan Shen, PhD<sup>5</sup>, John Oh, MD, FACS<sup>5</sup>, Cathy Eng, MD,  
8 FACP, FASCO<sup>1</sup>  
9

10  
11  
12 <sup>1</sup>Department of Medicine, Division of Hematology/Oncology, Vanderbilt University Medical  
13 Center, Nashville, Tennessee, United States of America  
14

15  
16  
17 <sup>2</sup>Department of Public Health Sciences, Penn State College of Medicine and Milton S. Hershey  
18 Medical Center, Hershey, Pennsylvania, United States of America  
19

20  
21  
22 <sup>3</sup> Center for Neural Engineering, Department of Engineering, Science and Mechanics, The  
23 Pennsylvania State University, Pennsylvania, United States of America  
24

25  
26 <sup>4</sup>Penn State College of Medicine, Hershey, Pennsylvania, United States of America  
27

28  
29 <sup>5</sup>Department of Surgery, Division of Trauma Surgery, Penn State College of Medicine and  
30 Milton S. Hershey Medical Center, Hershey, Pennsylvania, United States of America  
31

32 \*Contributed equally as co-first authors  
33

34 **To whom correspondence should be addressed:**

35 Paddy Ssentongo, MD, MPH, PhD  
36 500 University Drive  
37 Penn State College of Medicine  
38 Hershey PA, 17033 USA  
39 814-777-2741  
40 [psentongo@pennstatehealth.psu.edu](mailto:psentongo@pennstatehealth.psu.edu)  
41  
42

43 **Running head:** Colorectal cancer in Africa: a meta-analysis  
44

45 **Total number of words:** 2256

46 **Figures:** 7  
47  
48  
49  
50  
51  
52  
53  
54  
55  
56  
57  
58  
59  
60

1  
2  
3  
4  
5  
6 **Objectives:** Colorectal cancer (CRC) is the second leading cause of cancer deaths globally, with  
7  
8 low- and middle-income countries (LMIC) disproportionately affected. Estimates of CRC rates  
9  
10 in LMIC are scarce. We aimed to estimate (1) sex-specific incidence of CRC, (2) temporal trend  
11  
12 and (3) determine regional variations of rates on the African continent.  
13  
14

15  
16 **Design:** Systematic review and meta-analysis  
17  
18

19 **Methods:** PubMed (MEDLINE), OVID (MEDLINE), Scopus and Cochrane Library databases  
20  
21 were systematically searched from inception to 12/12/2020. We included population-based  
22  
23 studies that reported the incidence or prevalence estimates of CRC in Africa. Studies not  
24  
25 conducted in humans or did not directly report the rates of CRC were excluded. Random effects  
26  
27 model was used to pool the estimates. The methodological quality of studies was assessed with  
28  
29 the Newcastle-Ottawa Scale.  
30  
31

32  
33  
34 **Outcome measures:** Overall and sex-specific annual age-standardized incidence rates (ASIR) of  
35  
36 CRC per 100,000 population.  
37  
38

39  
40 **Results:** The meta-analysis included 14 studies consisting of 3365 individuals with CRC (mean  
41  
42 age, 58 years, 53% male). The overall ASIR of CRC in Africa per 100,000 population was 5.25  
43  
44 (95% CI: 4.08 to 6.75). The rates were slightly higher in males (4.76) than in females (4.18), but  
45  
46 not significantly different. Subgroup analysis indicated greater point estimates in North Africa  
47  
48 (8.66) compared to Sub-Saharan Africa (SSA) (5.91); and higher estimates in Eastern (8.29) and  
49  
50 Northern (8.66) Africa compared to Western (3.55) and Southern (3.57) Africa, but not  
51  
52  
53  
54  
55  
56  
57  
58  
59  
60

1  
2  
3 statistically significant. The overall trend in ASIR has remained constant at nearly 5 per 100,000  
4  
5 population for the last 6 decades.  
6  
7

8  
9 **Conclusion:** CRC estimates in Africa are heterogeneous and could be underestimated. High-  
10  
11 quality data collection systems such as population-based cancer registries may facilitate accurate  
12  
13 estimation of country-specific rates and provide critical information which would be lucrative to  
14  
15 the consideration of resources needed for screening, early detection, treatment, and improving  
16  
17 overall patient outcomes.  
18  
19

20  
21  
22  
23 **Funding:** None.  
24

25 **Registration:** None.  
26  
27

### 28 **Strengths and limitations of this study**

29  
30

- 31 • All United Nations (UN) regions (North Africa and sub-Saharan Africa) were  
32 represented.  
33
- 34 • UN subregions (Eastern, Western, Southern, and Northern) of Africa were represented.  
35
- 36 • Country-level data came from only 18% of the continent.  
37
- 38 • Middle Africa had no data on colorectal cancer prevalence.  
39  
40  
41  
42  
43  
44  
45  
46  
47  
48  
49  
50  
51  
52  
53  
54  
55  
56  
57  
58  
59  
60

## Introduction

Colorectal cancer (CRC) is the third most common cancer and the second leading cause of cancer deaths globally.<sup>1</sup> In 2018, there were an estimated 1.8 million new cases of colorectal cancer diagnoses and 862,000 deaths from CRC.<sup>1</sup> The majority of deaths from cancer occurred in low- and middle-income countries (LMIC), with most patients presenting with late-stage disease and commonly unable to obtain medical treatment services.

Even though the incidence of CRC has always been considered to be lower in LMIC, compared to high-income countries (HIC), the rates of colorectal cancer have been increasing in LMIC over time.<sup>2</sup> The rising incidence of cancer in LMIC has been attributed in part to the adoption of high-risk lifestyles such as smoking, excessive alcohol use, physical inactivity, as well as an aging population.<sup>3</sup>

Africa is the second largest and second most populated continent with an estimated population of 1.3 billion people in 2018, accounting for 16% of the world's human population.<sup>4</sup> Despite this vast population, CRC in Africa is not currently well characterized, in part due to deficiencies in the data on the incidence, prevalence, and mortality of all cancers in Africa. A vast majority of available data come from existing, limited cancer registries which cover less than half of the population.<sup>5</sup> Nevertheless, based on current and available data, colorectal cancer is considered the fifth most common cancer in Africa<sup>6</sup>. The rate of CRC is estimated to be higher in Northern Africa than Sub-Saharan Africa (SSA) due to the absence of screening systems and population-based cancer registries in SSA.<sup>5 6</sup>

This systematic review and meta-analysis aims to comprehensively characterize and estimate the incidence of CRC based on available data. These estimates will raise awareness regarding the

1  
2  
3 current incidence of CRC in Africa and will guide future public health allocation of resources to  
4 prevent, control and treat CRC.  
5  
6  
7  
8  
9

## 10 11 **METHODS**

### 12 13 **Search Strategy and Selection Criteria**

14  
15 This study adheres to the reporting guidance provided in the Preferred Reporting Items for  
16 Systematic Reviews and Meta-Analyses (PRISMA) in Supplementary Table 1.<sup>7,8</sup> We searched  
17 PubMed (MEDLINE), OVID (MEDLINE), Scopus and Cochrane Library databases from  
18 inception to 12/12/2020 for articles reporting the incidence rates of colorectal cancers in Africa.  
19  
20 We searched the grey or difficult to locate literature, including Google Scholar and preprint  
21 servers. We performed hand-searching of the reference lists of included studies, relevant  
22 reviews, or other relevant documents. The search terms of interest were identified by using  
23 Medical Search Headings (MeSH). They included “colorectal cancer” OR “colon cancer” OR  
24 “rectal cancer” OR “colorectal carcinoma” AND “epidemiology” OR “incidence” OR  
25 “prevalence” AND “Africa”. Duplicate studies were initially extracted via Endnote software.  
26  
27 Three reviewers (NA, MT, and PS) independently screened titles and abstracts of the studies for  
28 inclusion eligibility. The comprehensive list of studies found from the initial search was  
29 transferred into Endnote, which further removed duplicate studies. The inclusion criteria for this  
30 meta-analysis and systematic review were defined as studies that 1) reported the incidence or  
31 prevalence estimates of colorectal cancer in Africa 2) were conducted in human subjects 3) were  
32 population-based (all cases in a defined geographical area, or hospital or community-based  
33 surveillance). Excluded studies were not conducted in humans or did not directly report the rates  
34 of colorectal cancer, meta-analyses, literature reviews, or commentaries.  
35  
36  
37  
38  
39  
40  
41  
42  
43  
44  
45  
46  
47  
48  
49  
50  
51  
52  
53  
54  
55  
56  
57  
58  
59  
60



### **Patient and public involvement**

No patient and public involvement in this systematic review and meta-analysis.

### **Data Extraction and Quality Assessment**

After the reviewers initially screened titles and abstracts of potential articles, full-text articles were independently screened by three reviewers (NA, MT, and PS) for eligibility. In the event of a discrepancy regarding an article's inclusion, a consensus was reached by discussion. Articles that met inclusion criteria had appropriate data extracted using a standard data collection form. We extracted the following information: the year of publication, country, region, cohort and cohort year, study design, sample size, gender percent, sample size of patients with CRC. If duplicate articles identified, we included only mutually exclusive data.

### **Assessment of Methodological Quality of the Papers**

The methodological quality of studies was assessed with the Newcastle-Ottawa Scale, a validated tool for assessing quantitative cross-sectional, case-control and cohort studies.<sup>9</sup> Scores of 8 to the maximum score of 9 were defined as high quality, scores of 5 to 7 as intermediate quality, and scores of 1 to 4 as low quality.

### **Standardization**

Age standardization of incidence rates was carried out by the direct method, using age specific rates for 5-year age groups and the world standard population and was reported by each paper.<sup>10</sup>

## Statistical Analysis

The primary outcome of interest was the overall and sex-specific annual age-standardized incidence rate of colorectal cancer. The *metaprop* function from the R package *meta* was used to calculate the pooled effect estimates using random-effects models.<sup>11</sup> We applied the DerSimonian and Laird (DL) random-effects method to estimate the pooled between-study variance (heterogeneity).<sup>12</sup> Individual and pooled estimates were graphically displayed using forest plots. A random-effects model assumes the observed estimates of colorectal cancer can vary across studies because of real differences in the effect in each study as well as sampling variability (chance). Between-study heterogeneity was assessed using  $I^2$  statistics, expressed as % (low (25%), moderate (50%), and high (75%)) and Cochrane's  $Q$  statistic (significance level  $< 0.05$ ).<sup>13</sup> To investigate the sources of heterogeneity, we conducted subgroup analyses using year of study (Before and after the year 2000), United Nations regions (Sub-Saharan African vs. North Africa) and United Nations subregions (Western, Eastern, Southern, Northern, and Eastern Africa). Results were reported as the annual age-standardized incidence rate per 100,000 person-time. Potential ascertainment bias (as might be caused by publication bias) was assessed with funnel plots by plotting the study effect size against standard errors of the effect size and Egger/Begg test.<sup>14</sup> All statistical analyses were performed with R software, version 4.0.3 (R Core Team, Vienna, Austria).

## Results

### Study Selection

Our initial searches yielded 1203 studies, of which 53 underwent full-text screening (**Figure 1**). Of these, 22 were Conference proceedings, 15 came from overlapping populations and 2 were systematic reviews. A total of 14 studies matched all the eligibility criteria. Of the included studies, 2 were from South Africa,<sup>15 16</sup> 2 from Zimbabwe,<sup>17 18</sup> and 1 from Ghana<sup>19</sup>, Eritrea,<sup>20</sup> The Gambia,<sup>21</sup> Guinea,<sup>22</sup> Ivory Coast,<sup>23</sup> Mali<sup>24</sup>, Malawi<sup>25</sup> and Tunisia,<sup>26</sup> Uganda,<sup>27</sup> and Sudan<sup>28</sup> each. The paper by Wabinga and colleagues (2000) from Uganda described cancer incidence at 4-time points, 1960-1966; 1967-1971; 1991-1994 and 1995-1997.<sup>27</sup> These time points were analyzed independently to allow for trend analysis. A total of 3365 individuals with colorectal cancer (mean age, 58 years, 53% male) were analyzed. The percentages of colon and rectal cancer were 65% and 35%, respectively. The percentage with locally advanced and metastatic disease (stage III and IV) was 57.9%. Adenocarcinoma represented the majority of diagnosed colorectal cancers with a small proportion representing squamous cell carcinoma. Grades 1, 2, and 3 were 32.4, 60.7, and 8.36%, respectively.

### Annual age-standardized incidence rate of colorectal cancer per 100,000 person-year

As displayed in **Figure 2**, the overall annual age-standardized incidence rate of colorectal cancer per 100,000 person-year was 6.30 (95% CI: 4.59 to 8.65). The rates were slightly higher in males than in females but not significantly different (4.76 versus 4.18). The heterogeneity was moderate ( $I^2=58%$ ).

1  
2  
3 Subgroup analysis was performed by the United Nations regions (North Africa vs. Sub-Saharan  
4 Africa) and by United Nations subregions. Although the point estimate was higher in North Africa  
5 (8.66) compared to SSA (5.91), the difference was not significant (**Figure 3**).  
6  
7  
8  
9

10  
11  
12 Furthermore, the rates were greater in Eastern (8.29) and Northern (8.66) Africa compared to  
13 Western (3.55) and Southern (3.57) Africa, but not significantly different (**Figure 4**). To assess if  
14 the rates from recent studies (2000 and later) are higher than older studies (Before 2000), we  
15 carried out a stratified analysis. There was no difference in the rates of CRC 5.55 (95% CI: 2.57  
16 to 11.96) and 6.50 (95% CI: 4.72 to 8.94), respectively (**Figure 5**). The trend in ASIR has remained  
17 nearly constant at 4.5 per 100,000 population for the last 6 decades (**Figure 6**)  
18  
19  
20  
21  
22  
23  
24  
25  
26  
27

### 28 **Study Quality, Publication Bias, and Sensitivity Analyses**

29  
30  
31 The median study quality score for studies reporting on the incidence was 5 out of 8 (range=4–9).  
32  
33 The funnel plot (Supplemental **Figure 1A**) the value of the Egger test ( $p<0.0001$ ) and Begg test ( $p<0.0001$ ) indicated the presence of publication bias. We used the trim and fill method to adjust  
34 for the publication bias. If the asymmetry is due to publication bias, the adjusted estimates fall in  
35 the range of 5.76 to 12.22. Finally, Influence sensitivity analyses were by excluding and replacing  
36 one study at a time (leave-one-out method) from the meta-analysis and calculating the pooled  
37 ASIR for the remaining studies. No significant change from any of the pooled estimates was  
38 observed when other studies were removed in turn. The pooled ASIR ranged from 5.93 to 6.67  
39  
40  
41  
42  
43  
44  
45  
46  
47  
48  
49  
50  
51 (Supplemental **Figure 1B**)  
52  
53  
54  
55  
56  
57  
58  
59  
60

## Discussion

This paper provides a comprehensive meta-analysis of the patterns and trends in the CRC incidence in Africa. The estimated annual age-standardized incidence rate (ASIR) of colorectal cancer per 100,000 persons was 6.30. This rate is higher than reported in a 2012 systematic review of only sub-Saharan Africa (SSA) countries by Graham et al. which reported a crude incidence rate of 4.04 per 100,000.<sup>5</sup> When compared to SSA, North Africa had the highest ASIR of 8.66, while SSA had an ASIR of 5.91. Middle Africa was not represented in this meta-analysis.

CRC is known to be the most common malignancy of the GI tract<sup>29</sup>, and while previously thought to be a rare malignancy in Africa, recent data is proving otherwise.<sup>30 31</sup> In addition to being more common than previously recognized, CRC in Africa tends to present more commonly in young adults<sup>31</sup>. This trend in young adults is similar to current trends in the United States, Asia and Europe, where patients usually present with advanced stage, left-sided tumors, and poor histology.<sup>32</sup>

In the United States, colorectal cancer is the third most common cancer in both men and women but the 2<sup>nd</sup> leading cause of cancer death.<sup>33</sup> Rates of colorectal cancer in the United States have been declining since the mid-1980s in patients older than 50 years old, mainly due to increased cancer screening and changes in lifestyle<sup>15</sup>. This is in sharp contrast to young adults < 50 years old where there is an expected exponential increase between 2020 through 2030.<sup>34</sup> According to a study by Siegel et al. (2020), the ASIR of colorectal cancer in the United States from 2012-2016

1  
2  
3 was 38.7 per 100,000 persons<sup>21</sup>. Furthermore, in the United States, the ASIR in Blacks from 2012-  
4  
5 2016 was 45.7 compared to 38.6 in Non-Hispanic Whites. In the United Kingdom, the ASIR for  
6  
7 2017 was 68.0 per 100,000 persons<sup>22</sup>. The incidence of colorectal cancer in people of African  
8  
9 descent in the United States is 20% higher than the incidence in Caucasians<sup>23</sup>. In the United  
10  
11 States, people of African descent present at a younger age and with more advanced disease at  
12  
13 diagnosis and have the highest mortality rate among different ethnic groups<sup>35</sup>. Factors responsible  
14  
15 for these differences are multifactorial, including known health disparities, socioeconomic status,  
16  
17 genetic factors, and dietary influences<sup>36 37</sup>.

21  
22  
23  
24 Even though our study provides much lower age-standardized incidence rates, it is assumed that  
25  
26 these do not accurately reflect the actual incidence of colorectal cancer in Africa. We suspect this  
27  
28 number to be much higher. According to the study by Laiyemo et al. (2016), there is no population-  
29  
30 based colorectal cancer screening or guidelines in any African country to date.<sup>38 39</sup> To better  
31  
32 understand the true incidence rates of colorectal cancer in Africa, standardized screening  
33  
34 guidelines must be established. Given the lack of screening, patients commonly present with  
35  
36 advanced disease. More countries are implementing and establishing population based cancer  
37  
38 registries (PBCR)<sup>39</sup> described in this study by Omonisi and his colleagues. These registries should  
39  
40 inform us of more specific country incidence rates and allow for further population-based studies  
41  
42 that could unravel the mysteries behind the increased risk of colorectal cancer in people of African  
43  
44 descent.

45  
46  
47  
48  
49  
50  
51 The present analysis has major strengths. First, all United Nations regions (North Africa, SSA)  
52  
53 and subregions (Eastern, Western, Southern, and Northern Africa ) of Africa were represented  
54  
55

1  
2  
3 (except Middle Africa). Thus, our findings can be generalizable at the regional level of Africa.  
4  
5 Secondly, we included recent estimates of colorectal cancer in Africa. The present estimates are  
6  
7 the most updated figures of the rates of colorectal cancer in Africa and thus can be used to inform  
8  
9 the prevention and control strategies. Nevertheless, the present study has some limitations. First,  
10  
11 country-level data came from only 18% of the continent, meaning most countries were not  
12  
13 represented due to the lack of published literature on CRC incidence in these countries. Therefore,  
14  
15 the estimates may not be generalizable at the country-level. To mitigate this limitation, we  
16  
17 conducted subgroup analysis by African regions (North Africa, SSA) and subregions (Eastern,  
18  
19 Western, Southern, and Northern Africa) to explore possible regional and subregional specific  
20  
21 rates. Second, the estimates could suffer from potential selection bias due to a lack of random  
22  
23 population-based studies such as those conducted by the demographic and health surveys program  
24  
25 and country-based cancer registries. However, the present systematic review and meta-analysis  
26  
27 provides the updated estimates of colorectal cancer in Africa using the best available information,  
28  
29 and we have applied rigorous sensitivity analysis to minimize bias.  
30  
31  
32  
33  
34  
35  
36  
37

## 38 **Conclusion**

39  
40  
41 Colorectal cancer estimates in Africa are heterogeneous and could be underestimated.  
42  
43 Population-based colorectal cancer data are scarce in Africa. High-quality data collection  
44  
45 systems such as population-based cancer registries may facilitate country-specific rates and  
46  
47 provide accurate information which would be lucrative to the consideration of resources needed  
48  
49 for screening, early detection, treatment and improving overall patient outcomes.  
50  
51  
52  
53  
54  
55  
56  
57  
58  
59  
60

1  
2  
3 **Contributorship** NDA, CE and PS conceived and designed the study. NDA, MT and PS  
4 extracted data. PS performed statistical analysis and created figures. NDA and PS drafted the  
5 manuscript and made subsequent revisions. CE and JO supervised the study. EJO, CP and CS  
6 critically revised the manuscript for intellectual content. All authors read and approved the final  
7 version of this manuscript.  
8  
9

10  
11 **Funding** None  
12

13 **Competing interests** None declared.  
14

15 **Patient consent for publication** Not required.  
16

17 **Ethics approval** Not applicable  
18

19 **Ethical considerations**  
20

21  
22 This is a systematic review using publicly available data. We analyzed aggregated data and no  
23 personal identification information was accessed or reported. Therefore, no IRB was required.  
24  
25

26 **Provenance and peer review** Not commissioned, externally peer reviewed.  
27

28 **Data availability statement** All data needed to reproduce the results are included in the  
29 manuscript.  
30

31 **ORCID iD:** Paddy Ssentongo <http://orcid.org/0000-0003-1565-5731>  
32  
33  
34  
35  
36  
37  
38  
39  
40  
41  
42  
43  
44  
45  
46  
47  
48  
49  
50  
51  
52  
53  
54  
55  
56  
57  
58  
59  
60



## Figure legend

**Figure 1:** PRISMA flowchart of a systematic review of colorectal cancer incidence in Africa

**Figure 2: Overall and sex-specific annualized ASIR of colorectal cancer in Africa.** Event values represent the age-standardized incidence rates of colorectal cancer per 100,000 population. Blue squares and their corresponding lines are the point estimates and 95% confidence intervals (95% CI). Maroon diamonds represent the pooled estimate of the ASIR, overall and by sex (width denotes 95% CI). Although not statistically significant, the pooled ASIR of colorectal cancer in Africa was higher in males ( $I^2=39$ ) than in females ( $I^2=37$ ). P for interaction comparing the different subgroups =0.37.

**Figure 3: Overall ASIR (per 100,000 population) of colorectal cancer in Africa stratified by United Nations region (North Africa and sub-Saharan Africa).** Event values represent the age-standardized incidence rates of colorectal cancer per 100,000 population. Blue squares and their corresponding lines are the point estimates and 95% confidence intervals (95% CI). Maroon diamonds represent the pooled estimate of the ASIR, overall and by United Nations regions (width denotes 95% CI). Although not statistically significant, the pooled ASIR of colorectal cancer in Africa was higher in North Africa ( $I^2=76$ ) than SSA ( $I^2=45$ ). P for interaction comparing the different subgroups =0.21.

**Figure 4: ASIR (per 100,000 population) of colorectal cancer in Africa stratified by United Nations subregions (Northern, Western, Eastern, and Southern Africa).** Event values represent the age-standardized incidence rates of colorectal cancer per 100,000 population. Blue squares and their corresponding lines are the point estimates and 95% confidence intervals (95% CI). Maroon diamonds represent the pooled estimate of the ASIR, overall and by United Nations subregion (width denotes 95% CI).

1  
2  
3  
4  
5 **Figure 5:** ASIR (per 100,000 population) of colorectal cancer in Africa stratified by year of study (Before  
6 2000 and 2000 and after). Event values represent the age-standardized incidence rates of colorectal cancer  
7 per 100,000 population. Blue squares and their corresponding lines are the point estimates and 95%  
8 confidence intervals (95% CI). Maroon diamonds represent the pooled estimate of the ASIR, overall and  
9 by year categorized as before and after 2000 (width denotes 95% CI). There is no difference in the rates  
10 between the year categories.  
11  
12  
13  
14  
15  
16  
17  
18  
19

20 **Figure 6: Temporal trends in the incidence rates (per 100,000 population) of colorectal cancer in**  
21 **Africa.** Rates were constant over time.  
22  
23  
24  
25  
26  
27  
28  
29  
30  
31  
32  
33  
34  
35  
36  
37  
38  
39  
40  
41  
42  
43  
44  
45  
46  
47  
48  
49  
50  
51  
52  
53  
54  
55  
56  
57  
58  
59  
60

## REFERENCES

1. Bray F, Ferlay J, Soerjomataram I, et al. Global cancer statistics 2018: GLOBOCAN estimates of incidence and mortality worldwide for 36 cancers in 185 countries. *CA: a cancer journal for clinicians* 2018;68(6):394-424.
2. Arnold M, Sierra MS, Laversanne M, et al. Global patterns and trends in colorectal cancer incidence and mortality. *Gut* 2017;66(4):683-91.
3. Negin J, Cumming R, de Ramirez SS, et al. Risk factors for non-communicable diseases among older adults in rural Africa. *Tropical Medicine & International Health* 2011;16(5):640-46.
4. Anoba IB. How a population of 4.2 billion could impact Africa by 2100: the possible economic. *The SAIS Review of International Affairs* 2019
5. Graham A, Davies Adeloeye LG, Theodoratou E, et al. Estimating the incidence of colorectal cancer in Sub-Saharan Africa: A systematic analysis. *Journal of global health* 2012;2(2)
6. Parkin DM, Bray F, Ferlay J, et al. Cancer in africa 2012. *Cancer Epidemiology and Prevention Biomarkers* 2014;23(6):953-66.
7. Stroup DF, Berlin JA, Morton SC, et al. Meta-analysis of observational studies in epidemiology: a proposal for reporting. *Jama* 2000;283(15):2008-12.
8. Moher D, Liberati A, Tetzlaff J, et al. Preferred reporting items for systematic reviews and meta-analyses: the PRISMA statement. *PLoS med* 2009;6(7):e1000097.
9. Peterson J, Welch V, Losos M, et al. The Newcastle-Ottawa scale (NOS) for assessing the quality of nonrandomised studies in meta-analyses. *Ottawa: Ottawa Hospital Research Institute* 2011
10. Parkin D. Comparability and quality control in cancer registration. *IARC Technical Report* 1994;19:18-19.
11. Schwarzer G, Carpenter JR, Rücker G. Meta-analysis with R: Springer 2015.
12. DerSimonian R, Kacker R. Random-effects model for meta-analysis of clinical trials: an update. *Contemporary clinical trials* 2007;28(2):105-14.
13. Higgins JP, Thompson SG, Deeks JJ, et al. Measuring inconsistency in meta-analyses. *Bmj* 2003;327(7414):557-60.
14. Egger M, Smith GD, Schneider M, et al. Bias in meta-analysis detected by a simple, graphical test. *Bmj* 1997;315(7109):629-34.
15. Wentink M, Räckers M, Stupart D, et al. Incidence and histological features of colorectal cancer in the Northern Cape Province, South Africa. *South African Journal of Surgery* 2010;48(4):109-13.
16. Somdya NI, Bradshaw D, Gelderblom WC, et al. Cancer incidence in a rural population of South Africa, 1998–2002. *International Journal of Cancer* 2010;127(10):2420-29.
17. Chokunonga E, Levy L, Bassett M, et al. Cancer incidence in the African population of Harare, Zimbabwe: second results from the cancer registry 1993–1995. *International journal of cancer* 2000;85(1):54-59.
18. Bassett M, Chokunonga E, Mauchaza B, et al. Cancer in the African population of Harare, Zimbabwe, 1990–1992. *International journal of cancer* 1995;63(1):29-36.

19. Laryea DO, Awuah B, Amoako YA, et al. Cancer incidence in Ghana, 2012: evidence from a population-based cancer registry. *BMC cancer* 2014;14(1):1-8.
20. Medhin LB, Achila OO, Abrham AT, et al. Incidence of colorectal cancer in Eritrea: Data from the National Health Laboratory, 2011-2017. *PloS one* 2019;14(11):e0224045.
21. Bah E, Parkin D, Hall A, et al. Cancer in the Gambia: 1988–97. *British journal of cancer* 2001;84(9):1207-14.
22. Koulibaly M, Kabba IS, Cissé A, et al. Cancer incidence in Conakry, Guinea: first results from the Cancer Registry 1992–1995. *International Journal of Cancer* 1997;70(1):39-45.
23. Echimane AK, Ahnoux AA, Adoubi I, et al. Cancer incidence in Abidjan, Ivory Coast: first results from the cancer registry, 1995–1997. *Cancer* 2000;89(3):653-63.
24. Bayo S, Parkin DM, Koumare A, et al. Cancer in Mali, 1987–1988. *International Journal of Cancer* 1990;45(4):679-84.
25. Banda L, Parkin D, Dzamalala C, et al. Cancer incidence in Blantyre, Malawi 1994–1998. *Tropical Medicine & International Health* 2001;6(4):296-304.
26. Missaoui N, Jaidaine L, Abdelkader AB, et al. Colorectal cancer in central Tunisia: increasing incidence trends over a 15-year period. *Asian Pac J Cancer Prev* 2011;12(4):1073-76.
27. Wabinga H, Parkin D, Wabwire-Mangen F, et al. Trends in cancer incidence in Kyadondo County, Uganda, 1960–1997. *British journal of cancer* 2000;82(9):1585-92.
28. Saeed IE, Weng HY, Mohamed KH, et al. Cancer incidence in Khartoum, Sudan: first results from the Cancer Registry, 2009–2010. *Cancer medicine* 2014;3(4):1075-84.
29. Siegel RL, Miller KD, Jemal A. Cancer statistics, 2015. *CA: a cancer journal for clinicians* 2015;65(1):5-29.
30. Agyemang-Yeboah F, Yorke J, Obirikorang C, et al. Patterns and presentations of colorectal cancer at Komfo-Anokye teaching hospital Kumasi, Ghana. *Pan African Medical Journal* 2017;28(1):142.
31. Irabor D, Adedeji O. Colorectal cancer in Nigeria: 40 years on. A review. *European journal of cancer care* 2009;18(2):110-15.
32. Mauri G, Sartore-Bianchi A, Russo AG, et al. Early-onset colorectal cancer in young individuals. *Molecular oncology* 2019;13(2):109-31.
33. Gu M, Thapa S. Colorectal cancer in the United States and a review of its heterogeneity among Asian American subgroups. *Asia-Pacific Journal of Clinical Oncology* 2020;16(4):193-200.
34. Bailey CE, Hu C-Y, You YN, et al. Increasing disparities in the age-related incidences of colon and rectal cancers in the United States, 1975-2010. *JAMA surgery* 2015;150(1):17-22.
35. Jackson CS, Oman M, Patel AM, et al. Health disparities in colorectal cancer among racial and ethnic minorities in the United States. *Journal of gastrointestinal oncology* 2016;7(Suppl 1):S32.
36. Ou J, Carbonero F, Zoetendal EG, et al. Diet, microbiota, and microbial metabolites in colon cancer risk in rural Africans and African Americans. *The American journal of clinical nutrition* 2013;98(1):111-20.
37. Sharma I, Kim S, Sridhar S, et al. Colorectal cancer: an emphasis on factors influencing racial/ethnic disparities. *Critical Reviews™ in Oncogenesis* 2020;25(2)
38. Laiyemo AO, Brawley O, Irabor D, et al. Towards colorectal cancer control in Africa. *International journal of cancer Journal international du cancer* 2016;138(4):1033.

1  
2  
3  
4  
5  
6  
7  
8  
9  
10  
11  
12  
13  
14  
15  
16  
17  
18  
19  
20  
21  
22  
23  
24  
25  
26  
27  
28  
29  
30  
31  
32  
33  
34  
35  
36  
37  
38  
39  
40  
41  
42  
43  
44  
45  
46  
47  
48  
49  
50  
51  
52  
53  
54  
55  
56  
57  
58  
59  
60

39. Omonisi AE, Liu B, Parkin DM. Population-Based Cancer Registration in Sub-Saharan Africa: Its Role in Research and Cancer Control. *JCO Global Oncology* 2020;6

For peer review only



only

1  
2  
3  
4  
5  
6  
7  
8  
9  
10  
11  
12  
13  
14  
15  
16  
17  
18  
19  
20  
21  
22  
23  
24  
25  
26  
27  
28  
29  
30  
31  
32  
33  
34  
35  
36  
37  
38  
39  
40  
41  
42  
43  
44  
45  
46  
47  
48  
49  
50  
51  
52  
53  
54  
55  
56  
57  
58  
59  
60



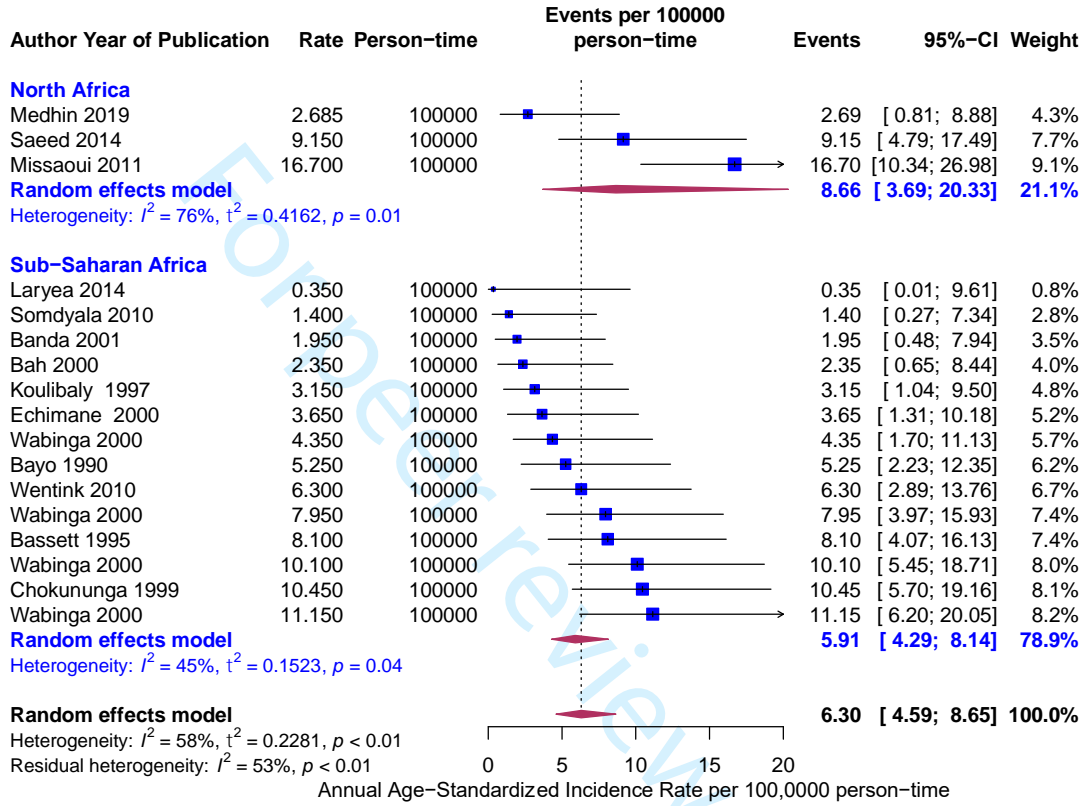







# Temporal Trend

1  
2  
3  
4  
5  
6  
7  
8  
9  
10  
11  
12  
13  
14  
15  
16  
17  
18  
19  
20  
21  
22  
23  
24  
25  
26  
27  
28  
29  
30  
31  
32  
33  
34  
35  
36  
37  
38  
39  
40  
41  
42  
43  
44



- UN Region**
- Eastern Africa
  - Northern Africa
  - Southern Africa
  - Western Africa

**SUPPLEMENTARY MATERIAL FOR THE MANUSCRIPT****Age-standardized incidence rate and epidemiology of colorectal cancer in Africa:  
a systematic review and meta-analysis**

Nina D. Arhin, MD<sup>1\*</sup>, Paddy Ssentongo, MD, MPH, PhD<sup>2,3\*</sup>, Morris Taylor<sup>4</sup>, Elizabeth J. Olecki, MD<sup>5</sup>, Colette Pameijer, MD, FACS<sup>5</sup>, Chan Shen, PhD<sup>5</sup>, John Oh, MD, FACS<sup>5</sup>, Cathy Eng, MD, FACP, FASCO<sup>1</sup>

<sup>1</sup>Department of Medicine, Division of Hematology/Oncology, Vanderbilt University Medical Center, Nashville, Tennessee, United States of America

<sup>2</sup>Department of Public Health Sciences, Penn State College of Medicine and Milton S. Hershey Medical Center, Hershey, Pennsylvania, United States of America

<sup>3</sup>Center for Neural Engineering, Department of Engineering, Science and Mechanics, The Pennsylvania State University, Pennsylvania, United States of America

<sup>4</sup>Penn State College of Medicine, Hershey, Pennsylvania, United States of America

<sup>5</sup>Department of Surgery, Division of Trauma Surgery, Penn State College of Medicine and Milton S. Hershey Medical Center, Hershey, Pennsylvania, United States of America

Contributed equally as co-first authors

**To whom correspondence should be addressed:**

Paddy Ssentongo, MD, MPH, PhD

500 University Drive

Penn State College of Medicine

Hershey PA, 17033 USA

814-777-2741

[pssentongo@pennstatehealth.psu.edu](mailto:pssentongo@pennstatehealth.psu.edu)

**Running head:** Colorectal cancer in Africa: a meta-analysis

### Search terms used in PubMed (MEDLINE)

1. ((colon cancer[MeSH Terms]) OR (Colorectal Cancer) OR (rectal cancer[MeSH Terms])) OR (colorectal carcinoma[MeSH Terms]))
2. (Epidemiology[MeSH Terms])) OR (Incidence[MeSH Terms])) OR (Prevalence[MeSH Terms]))]
3. (Africa OR Africa South of the Sahara OR Angola OR Benin OR Botswana OR Burkina Faso OR Burundi OR Cameroun OR Cameroon OR Cape Verde OR Chad OR Central African Republic of Comoros OR Congo OR Cote d'Ivoire OR Democratic Republic of the Congo OR Equatorial Guinea OR Eritrea OR Ethiopia OR Gabon OR Gambia OR Ghana OR Guinea OR Guinea Bissau OR Kenya OR Lesotho OR Liberia OR Madagascar OR Malawi OR Mali OR Mozambique OR Namibia OR Niger OR Nigeria OR Rwanda OR Sao Tome OR Senegal OR Seychelles OR Sierra Leone OR Somalia OR South Africa OR Swaziland OR Togo OR Uganda OR Tanzania OR Zambia OR Zimbabwe OR Africa, Northern, OR Algeria OR Egypt OR Libya OR Morocco OR Tunisia OR western Sahara OR South Africa OR Africa, Western OR Africa, Southern OR Africa, Northern OR Africa, Eastern OR Africa, Central)
4. 1 AND 2 AND 3



**Supplemental Figure 1: Publication bias and sensitivity analyses.** Funnel plot was not interpretable (A). Influence analysis shows no significant change from any of the pooled estimates observed when other studies were removed in turn. The pooled ASIR ranged from 5.93 to 6.67 (B)

| Section and Topic             | Item # | Checklist item                                                                                                                                                                                                                                                                                       | Location where item is reported |
|-------------------------------|--------|------------------------------------------------------------------------------------------------------------------------------------------------------------------------------------------------------------------------------------------------------------------------------------------------------|---------------------------------|
| <b>TITLE</b>                  |        |                                                                                                                                                                                                                                                                                                      |                                 |
| Title                         | 1      | Identify the report as a systematic review.                                                                                                                                                                                                                                                          | 1                               |
| <b>ABSTRACT</b>               |        |                                                                                                                                                                                                                                                                                                      |                                 |
| Abstract                      | 2      | See the PRISMA 2020 for Abstracts checklist.                                                                                                                                                                                                                                                         | 2                               |
| <b>INTRODUCTION</b>           |        |                                                                                                                                                                                                                                                                                                      |                                 |
| Rationale                     | 3      | Describe the rationale for the review in the context of existing knowledge.                                                                                                                                                                                                                          | 4                               |
| Objectives                    | 4      | Provide an explicit statement of the objective(s) or question(s) the review addresses.                                                                                                                                                                                                               | 4                               |
| <b>METHODS</b>                |        |                                                                                                                                                                                                                                                                                                      |                                 |
| Eligibility criteria          | 5      | Specify the inclusion and exclusion criteria for the review and how studies were grouped for the syntheses.                                                                                                                                                                                          | 5                               |
| Information sources           | 6      | Specify all databases, registers, websites, organisations, reference lists and other sources searched or consulted to identify studies. Specify the date when each source was last searched or consulted.                                                                                            | 5                               |
| Search strategy               | 7      | Present the full search strategies for all databases, registers and websites, including any filters and limits used.                                                                                                                                                                                 | 5                               |
| Selection process             | 8      | Specify the methods used to decide whether a study met the inclusion criteria of the review, including how many reviewers screened each record and each report retrieved, whether they worked independently, and if applicable, details of automation tools used in the process.                     | 6                               |
| Data collection process       | 9      | Specify the methods used to collect data from reports, including how many reviewers collected data from each report, whether they worked independently, any processes for obtaining or confirming data from study investigators, and if applicable, details of automation tools used in the process. | 6                               |
| Data items                    | 10a    | List and define all outcomes for which data were sought. Specify whether all results that were compatible with each outcome domain in each study were sought (e.g. for all measures, time points, analyses), and if not, the methods used to decide which results to collect.                        | 6                               |
|                               | 10b    | List and define all other variables for which data were sought (e.g. participant and intervention characteristics, funding sources). Describe any assumptions made about any missing or unclear information.                                                                                         | 6                               |
| Study risk of bias assessment | 11     | Specify the methods used to assess risk of bias in the included studies, including details of the tool(s) used, how many reviewers assessed each study and whether they worked independently, and if applicable, details of automation tools used in the process.                                    | 6                               |
| Effect measures               | 12     | Specify for each outcome the effect measure(s) (e.g. risk ratio, mean difference) used in the synthesis or presentation of results.                                                                                                                                                                  | 7                               |
| Synthesis methods             | 13a    | Describe the processes used to decide which studies were eligible for each synthesis (e.g. tabulating the study intervention characteristics and comparing against the planned groups for each synthesis (item #5)).                                                                                 | 7                               |
|                               | 13b    | Describe any methods required to prepare the data for presentation or synthesis, such as handling of missing summary statistics,                                                                                                                                                                     | 7                               |

| Section and Topic             | Item # | Checklist item                                                                                                                                                                                                                                                                       | Location where item is reported |
|-------------------------------|--------|--------------------------------------------------------------------------------------------------------------------------------------------------------------------------------------------------------------------------------------------------------------------------------------|---------------------------------|
|                               |        | or data conversions.                                                                                                                                                                                                                                                                 |                                 |
|                               | 13c    | Describe any methods used to tabulate or visually display results of individual studies and syntheses.                                                                                                                                                                               | 7                               |
|                               | 13d    | Describe any methods used to synthesize results and provide a rationale for the choice(s). If meta-analysis was performed, describe the model(s), method(s) to identify the presence and extent of statistical heterogeneity, and software package(s) used.                          |                                 |
|                               | 13e    | Describe any methods used to explore possible causes of heterogeneity among study results (e.g. subgroup analysis, meta-regression).                                                                                                                                                 | 7                               |
|                               | 13f    | Describe any sensitivity analyses conducted to assess robustness of the synthesized results.                                                                                                                                                                                         | 7                               |
| Reporting bias assessment     | 14     | Describe any methods used to assess risk of bias due to missing results in a synthesis (arising from reporting biases).                                                                                                                                                              | 7                               |
| Certainty assessment          | 15     | Describe any methods used to assess certainty (or confidence) in the body of evidence for an outcome.                                                                                                                                                                                | 7                               |
| <b>RESULTS</b>                |        |                                                                                                                                                                                                                                                                                      |                                 |
| Study selection               | 16a    | Describe the results of the search and selection process, from the number of records identified in the search to the number of studies included in the review, ideally using a flow diagram.                                                                                         | 8-16                            |
|                               | 16b    | Cite studies that might appear to meet the inclusion criteria, but which were excluded, and explain why they were excluded.                                                                                                                                                          | 8                               |
| Study characteristics         | 17     | Cite each included study and present its characteristics.                                                                                                                                                                                                                            | 8                               |
| Risk of bias in studies       | 18     | Present assessments of risk of bias for each included study.                                                                                                                                                                                                                         | 8-16                            |
| Results of individual studies | 19     | For all outcomes, present, for each study: (a) summary statistics for each group (where appropriate) and (b) an effect estimate and its precision (e.g. confidence/credible interval), ideally using structured tables or plots.                                                     | 8-16                            |
| Results of syntheses          | 20a    | For each synthesis, briefly summarise the characteristics and risk of bias among contributing studies.                                                                                                                                                                               | 8-16                            |
|                               | 20b    | Present results of all statistical syntheses conducted. If meta-analysis was done, present for each the summary estimate and its precision (e.g. confidence/credible interval) and measures of statistical heterogeneity. If comparing groups, describe the direction of the effect. | 8-16                            |
|                               | 20c    | Present results of all investigations of possible causes of heterogeneity among study results.                                                                                                                                                                                       | 8-16                            |
|                               | 20d    | Present results of all sensitivity analyses conducted to assess the robustness of the synthesized results.                                                                                                                                                                           | 8-16                            |
| Reporting biases              | 21     | Present assessments of risk of bias due to missing results (arising from reporting biases) for each synthesis assessed.                                                                                                                                                              | 8-16                            |
| Certainty of evidence         | 22     | Present assessments of certainty (or confidence) in the body of evidence for each outcome assessed.                                                                                                                                                                                  | 8-16                            |

| Section and Topic                              | Item # | Checklist item                                                                                                                                                                                                                             | Location where item is reported |
|------------------------------------------------|--------|--------------------------------------------------------------------------------------------------------------------------------------------------------------------------------------------------------------------------------------------|---------------------------------|
| <b>DISCUSSION</b>                              |        |                                                                                                                                                                                                                                            |                                 |
| Discussion                                     | 23a    | Provide a general interpretation of the results in the context of other evidence.                                                                                                                                                          | 18-21                           |
|                                                | 23b    | Discuss any limitations of the evidence included in the review.                                                                                                                                                                            | 18-21                           |
|                                                | 23c    | Discuss any limitations of the review processes used.                                                                                                                                                                                      | 18-21                           |
|                                                | 23d    | Discuss implications of the results for practice, policy, and future research.                                                                                                                                                             | 20                              |
| <b>OTHER INFORMATION</b>                       |        |                                                                                                                                                                                                                                            |                                 |
| Registration and protocol                      | 24a    | Provide registration information for the review, including register name and registration number, or state that the review was not registered.                                                                                             | 5                               |
|                                                | 24b    | Indicate where the review protocol can be accessed, or state that a protocol was not prepared.                                                                                                                                             | 5                               |
|                                                | 24c    | Describe and explain any amendments to information provided at registration or in the protocol.                                                                                                                                            | NA                              |
| Support                                        | 25     | Describe sources of financial or non-financial support for the review, and the role of the funders or sponsors in the review.                                                                                                              | 22                              |
| Competing interests                            | 26     | Declare any competing interests of review authors.                                                                                                                                                                                         | 22                              |
| Availability of data, code and other materials | 27     | Report which of the following are publicly available and where they can be found: template data collection forms; data extracted from included studies; data used for all analyses; analytic code; any other materials used in the review. | 22                              |

**Supplemental Table 1: PRISMA checklist**





## PRISMA 2020 Checklist

| Section and Topic             | Item # | Checklist item                                                                                                                                                                                                                                                                                       | Location where item is reported |
|-------------------------------|--------|------------------------------------------------------------------------------------------------------------------------------------------------------------------------------------------------------------------------------------------------------------------------------------------------------|---------------------------------|
| <b>TITLE</b>                  |        |                                                                                                                                                                                                                                                                                                      |                                 |
| Title                         | 1      | Identify the report as a systematic review.                                                                                                                                                                                                                                                          | 1                               |
| <b>ABSTRACT</b>               |        |                                                                                                                                                                                                                                                                                                      |                                 |
| Abstract                      | 2      | See the PRISMA 2020 for Abstracts checklist.                                                                                                                                                                                                                                                         | 2                               |
| <b>INTRODUCTION</b>           |        |                                                                                                                                                                                                                                                                                                      |                                 |
| Rationale                     | 3      | Describe the rationale for the review in the context of existing knowledge.                                                                                                                                                                                                                          | 4                               |
| Objectives                    | 4      | Provide an explicit statement of the objective(s) or question(s) the review addresses.                                                                                                                                                                                                               | 4                               |
| <b>METHODS</b>                |        |                                                                                                                                                                                                                                                                                                      |                                 |
| Eligibility criteria          | 5      | Specify the inclusion and exclusion criteria for the review and how studies were grouped for the syntheses.                                                                                                                                                                                          | 5                               |
| Information sources           | 6      | Specify all databases, registers, websites, organisations, reference lists and other sources searched or consulted to identify studies. Specify the date when each source was last searched or consulted.                                                                                            | 5                               |
| Search strategy               | 7      | Present the full search strategies for all databases, registers and websites, including any filters and limits used.                                                                                                                                                                                 | 5                               |
| Selection process             | 8      | Specify the methods used to decide whether a study met the inclusion criteria of the review, including how many reviewers screened each record and each report retrieved, whether they worked independently, and if applicable, details of automation tools used in the process.                     | 6                               |
| Data collection process       | 9      | Specify the methods used to collect data from reports, including how many reviewers collected data from each report, whether they worked independently, any processes for obtaining or confirming data from study investigators, and if applicable, details of automation tools used in the process. | 6                               |
| Data items                    | 10a    | List and define all outcomes for which data were sought. Specify whether all results that were compatible with each outcome domain in each study were sought (e.g. for all measures, time points, analyses), and if not, the methods used to decide which results to collect.                        | 6                               |
|                               | 10b    | List and define all other variables for which data were sought (e.g. participant and intervention characteristics, funding sources). Describe any assumptions made about any missing or unclear information.                                                                                         | 6                               |
| Study risk of bias assessment | 11     | Specify the methods used to assess risk of bias in the included studies, including details of the tool(s) used, how many reviewers assessed each study and whether they worked independently, and if applicable, details of automation tools used in the process.                                    | 6                               |
| Effect measures               | 12     | Specify for each outcome the effect measure(s) (e.g. risk ratio, mean difference) used in the synthesis or presentation of results.                                                                                                                                                                  | 7                               |
| Synthesis methods             | 13a    | Describe the processes used to decide which studies were eligible for each synthesis (e.g. tabulating the study intervention characteristics and comparing against the planned groups for each synthesis (item #5)).                                                                                 | 7                               |
|                               | 13b    | Describe any methods required to prepare the data for presentation or synthesis, such as handling of missing summary statistics, or data conversions.                                                                                                                                                | 7                               |
|                               | 13c    | Describe any methods used to tabulate or visually display results of individual studies and syntheses.                                                                                                                                                                                               | 7                               |
|                               | 13d    | Describe any methods used to synthesize results and provide a rationale for the choice(s). If meta-analysis was performed, describe the model(s), method(s) to identify the presence and extent of statistical heterogeneity, and software package(s) used.                                          |                                 |
|                               | 13e    | Describe any methods used to explore possible causes of heterogeneity among study results (e.g. subgroup analysis, meta-regression).                                                                                                                                                                 | 7                               |
|                               | 13f    | Describe any sensitivity analyses conducted to assess robustness of the synthesized results.                                                                                                                                                                                                         | 7                               |
| Reporting bias assessment     | 14     | Describe any methods used to assess risk of bias due to missing results in a synthesis (arising from reporting biases).                                                                                                                                                                              | 7                               |
| Certainty                     | 15     | Describe any methods used to assess certainty (or confidence) in the body of evidence for an outcome.                                                                                                                                                                                                | 7                               |



## PRISMA 2020 Checklist

| Section and Topic                              | Item # | Checklist item                                                                                                                                                                                                                                                                       | Location where item is reported |
|------------------------------------------------|--------|--------------------------------------------------------------------------------------------------------------------------------------------------------------------------------------------------------------------------------------------------------------------------------------|---------------------------------|
| assessment                                     |        |                                                                                                                                                                                                                                                                                      |                                 |
| <b>RESULTS</b>                                 |        |                                                                                                                                                                                                                                                                                      |                                 |
| Study selection                                | 16a    | Describe the results of the search and selection process, from the number of records identified in the search to the number of studies included in the review, ideally using a flow diagram.                                                                                         | 8-16                            |
|                                                | 16b    | Cite studies that might appear to meet the inclusion criteria, but which were excluded, and explain why they were excluded.                                                                                                                                                          | 8                               |
| Study characteristics                          | 17     | Cite each included study and present its characteristics.                                                                                                                                                                                                                            | 8                               |
| Risk of bias in studies                        | 18     | Present assessments of risk of bias for each included study.                                                                                                                                                                                                                         | 8-16                            |
| Results of individual studies                  | 19     | For all outcomes, present, for each study: (a) summary statistics for each group (where appropriate) and (b) an effect estimate and its precision (e.g. confidence/credible interval), ideally using structured tables or plots.                                                     | 8-16                            |
| Results of syntheses                           | 20a    | For each synthesis, briefly summarise the characteristics and risk of bias among contributing studies.                                                                                                                                                                               | 8-16                            |
|                                                | 20b    | Present results of all statistical syntheses conducted. If meta-analysis was done, present for each the summary estimate and its precision (e.g. confidence/credible interval) and measures of statistical heterogeneity. If comparing groups, describe the direction of the effect. | 8-16                            |
|                                                | 20c    | Present results of all investigations of possible causes of heterogeneity among study results.                                                                                                                                                                                       | 8-16                            |
|                                                | 20d    | Present results of all sensitivity analyses conducted to assess the robustness of the synthesized results.                                                                                                                                                                           | 8-16                            |
| Reporting biases                               | 21     | Present assessments of risk of bias due to missing results (arising from reporting biases) for each synthesis assessed.                                                                                                                                                              | 8-16                            |
| Certainty of evidence                          | 22     | Present assessments of certainty (or confidence) in the body of evidence for each outcome assessed.                                                                                                                                                                                  | 8-16                            |
| <b>DISCUSSION</b>                              |        |                                                                                                                                                                                                                                                                                      |                                 |
| Discussion                                     | 23a    | Provide a general interpretation of the results in the context of other evidence.                                                                                                                                                                                                    | 18-21                           |
|                                                | 23b    | Discuss any limitations of the evidence included in the review.                                                                                                                                                                                                                      | 18-21                           |
|                                                | 23c    | Discuss any limitations of the review processes used.                                                                                                                                                                                                                                | 18-21                           |
|                                                | 23d    | Discuss implications of the results for practice, policy, and future research.                                                                                                                                                                                                       | 20                              |
| <b>OTHER INFORMATION</b>                       |        |                                                                                                                                                                                                                                                                                      |                                 |
| Registration and protocol                      | 24a    | Provide registration information for the review, including register name and registration number, or state that the review was not registered.                                                                                                                                       | 5                               |
|                                                | 24b    | Indicate where the review protocol can be accessed, or state that a protocol was not prepared.                                                                                                                                                                                       | 5                               |
|                                                | 24c    | Describe and explain any amendments to information provided at registration or in the protocol.                                                                                                                                                                                      | NA                              |
| Support                                        | 25     | Describe sources of financial or non-financial support for the review, and the role of the funders or sponsors in the review.                                                                                                                                                        | 22                              |
| Competing interests                            | 26     | Declare any competing interests of review authors.                                                                                                                                                                                                                                   | 22                              |
| Availability of data, code and other materials | 27     | Report which of the following are publicly available and where they can be found: template data collection forms; data extracted from included studies; data used for all analyses; analytic code; any other materials used in the review.                                           | 22                              |



## PRISMA 2020 Checklist

For more information, visit: <http://www.prisma-statement.org/>

For peer review only

1  
2  
3  
4  
5  
6  
7  
8  
9  
10  
11  
12  
13  
14  
15  
16  
17  
18  
19  
20  
21  
22  
23  
24  
25  
26  
27  
28  
29  
30  
31  
32  
33  
34  
35  
36  
37  
38  
39  
40  
41  
42  
43  
44  
45  
46  
47
